# Supplementary material for: Do hospital pressures change following rotavirus vaccine introduction? A retrospective database analysis in a large paediatric hospital in the UK
Source: PubMed Central journal article supplement — BMJ Open. 2019 May 15;9(5):e027739. doi: 10.1136/bmjopen-2018-027739 (PMC6530452; doi:10.1136/bmjopen-2018-027739), 2019-05-15
Supplement: bmjopen-2018-027739.draft_revisions.pdf [file bmjopen-2018-027739.draft_revisions.pdf]

# BMJ Open

BMJ Open is committed to open peer review. As part of this commitment we make the peer review history of every article we publish publicly available.

When an article is published we post the peer reviewers' comments and the authors' responses online. We also post the versions of the paper that were used during peer review. These are the versions that the peer review comments apply to.

The versions of the paper that follow are the versions that were submitted during the peer review process. They are not the versions of record or the final published versions. They should not be cited or distributed as the published version of this manuscript.

BMJ Open is an open access journal and the full, final, typeset and author-corrected version of record of the manuscript is available on our site with no access controls, subscription charges or pay-per-view fees (<http://bmjopen.bmj.com>).

If you have any questions on BMJ Open's open peer review process please email [info.bmjopen@bmj.com](mailto:info.bmjopen@bmj.com)

# BMJ Open

## The impact of rotavirus vaccination on hospital pressures in a large paediatric hospital in the United Kingdom

|                               |                                                                                                                                                                                                                                                                                                                                                                                                                                                                                                                                                                                                                                                                                                                                                                                                                                                                                                                                                                                                                                                                                                                                                                                                                             |
|-------------------------------|-----------------------------------------------------------------------------------------------------------------------------------------------------------------------------------------------------------------------------------------------------------------------------------------------------------------------------------------------------------------------------------------------------------------------------------------------------------------------------------------------------------------------------------------------------------------------------------------------------------------------------------------------------------------------------------------------------------------------------------------------------------------------------------------------------------------------------------------------------------------------------------------------------------------------------------------------------------------------------------------------------------------------------------------------------------------------------------------------------------------------------------------------------------------------------------------------------------------------------|
| Journal:                      | <i>BMJ Open</i>                                                                                                                                                                                                                                                                                                                                                                                                                                                                                                                                                                                                                                                                                                                                                                                                                                                                                                                                                                                                                                                                                                                                                                                                             |
| Manuscript ID                 | bmjopen-2018-027739                                                                                                                                                                                                                                                                                                                                                                                                                                                                                                                                                                                                                                                                                                                                                                                                                                                                                                                                                                                                                                                                                                                                                                                                         |
| Article Type:                 | Research                                                                                                                                                                                                                                                                                                                                                                                                                                                                                                                                                                                                                                                                                                                                                                                                                                                                                                                                                                                                                                                                                                                                                                                                                    |
| Date Submitted by the Author: | 05-Nov-2018                                                                                                                                                                                                                                                                                                                                                                                                                                                                                                                                                                                                                                                                                                                                                                                                                                                                                                                                                                                                                                                                                                                                                                                                                 |
| Complete List of Authors:     | <p>Heinsbroek, Ellen; University of Liverpool, Department of Clinical Infection, Microbiology &amp; Immunology, Institute of Infection and Global Health</p> <p>Hungerford, Daniel; University of Liverpool, Department of Clinical Infection, Microbiology &amp; Immunology, Institute of Infection and Global Health; Public Health England, Field Service – North West, National Infection Service</p> <p>Cooke, Richard; Alder Hey Children’s NHS Foundation Trust</p> <p>Chowdhury, Margaret; Alder Hey Children’s NHS Foundation Trust</p> <p>Cargill, James; Alder Hey Children’s NHS Foundation Trust</p> <p>Bar-Zeev, Naor; Johns Hopkins University Bloomberg School of Public Health, International Vaccine Access Center</p> <p>French, Neil; University of Liverpool, Department of Clinical Infection, Microbiology &amp; Immunology, Institute of Infection and Global Health</p> <p>Theodorou, Eleni; GSK Pharma, Health Economics</p> <p>Standaert, Baudouin; GSK Vaccines, Health Economics; a,</p> <p>Cunliffe, Nigel; University of Liverpool, Department of Clinical Infection, Microbiology &amp; Immunology, Institute of Infection and Global Health; Alder Hey Children’s NHS Foundation Trust</p> |
| Keywords:                     | Paediatric infectious disease & immunisation < PAEDIATRICS, nosocomial infections, Hospital, Epidemiology < INFECTIOUS DISEASES, Rotavirus, Quality in health care < HEALTH SERVICES ADMINISTRATION & MANAGEMENT                                                                                                                                                                                                                                                                                                                                                                                                                                                                                                                                                                                                                                                                                                                                                                                                                                                                                                                                                                                                            |
|                               |                                                                                                                                                                                                                                                                                                                                                                                                                                                                                                                                                                                                                                                                                                                                                                                                                                                                                                                                                                                                                                                                                                                                                                                                                             |

SCHOLARONE™  
Manuscripts

1  
2  
3 1 **The impact of rotavirus vaccination on hospital pressures in a large paediatric hospital in**  
4  
5  
6 2 **the United Kingdom**

7  
8 3 Ellen Heinsbroek<sup>a</sup>; Daniel Hungerford<sup>a</sup>; Richard PD Cooke<sup>b</sup>; Margaret Chowdhury<sup>c</sup>; James S  
9  
10 4 Cargill<sup>b</sup>; Naor Bar-Zeev<sup>a</sup>; Neil French<sup>a</sup>; Eleni Theodorou<sup>d</sup>; Baudouin Standaert<sup>e</sup>; Nigel A  
11  
12  
13 5 Cunliffe<sup>a,b</sup>

14  
15 6 <sup>a</sup> Centre for Global Vaccine Research, Institute of Infection and Global Health, University of  
16  
17  
18 7 Liverpool, Liverpool, UK

19  
20 8 <sup>b</sup> Department of Microbiology, Alder Hey Children's NHS Foundation Trust, Liverpool, UK

21  
22  
23 9 <sup>c</sup> Patient Flow, Alder Hey Children's NHS Foundation Trust, Liverpool, UK

24  
25 10 <sup>d</sup> GSK, Uxbridge, UK

26  
27  
28 11 <sup>e</sup> GSK, Wavre, Belgium

29  
30 12 **Corresponding author:**

31  
32 13 Nigel A Cunliffe

33  
34 14 Institute of Infection and Global Health

35  
36  
37 15 University of Liverpool, Ronald Ross Building,

38  
39  
40 16 8 West Derby Street, Liverpool L69 7BE

41  
42 17 United Kingdom

43  
44  
45 18 +44 (0)151 795 9660;

46  
47 19 n.a.cunliffe@liverpool.ac.uk

48  
49 20 **Abbreviated title:** Hospital pressures post rotavirus vaccination

50  
51  
52 21 **Word count:** 3245

53  
54  
55 22

1  
2  
3 **23 ABSTRACT**  
4

5 **24 Objective** Hospitals in the United Kingdom are under increasing clinical and financial  
6  
7  
8 **25 pressures.** Post introduction of childhood rotavirus vaccination in the UK in 2013, rotavirus  
9  
10 **26 gastroenteritis (RVGE) hospitalisations** reduced significantly. We evaluated the impact of  
11  
12  
13 **27 rotavirus vaccine introduction on ‘hospital pressure’** (demand on healthcare resources and  
14  
15 **28 staff) in a paediatric setting in the UK.**

16  
17  
18 **29 Design** Ecological impact study using retrospective hospital database analysis between July  
19  
20 **30 2007 and June 2015.**

21  
22  
23 **31 Setting** A large paediatric hospital providing primary, secondary and tertiary care in  
24  
25 **32 Merseyside, UK.**

26  
27  
28 **33 Participants** Hospital admissions aged < 15 years. Outcomes were calculated for four  
29  
30 **34 different patient groups identified through diagnosis coding (ICD-10) and/or laboratory**  
31  
32 **35 confirmation: all admissions; any infection, acute gastroenteritis; and RVGE.**

33  
34  
35 **36 Methods** Hospital pressures were compared before and after rotavirus vaccine  
36  
37 **37 introduction: these included bed occupancy, hospital-acquired infection rate, unplanned**  
38  
39 **38 readmission rate, and outlier rate (medical patients admitted to surgical wards due to lack**  
40  
41 **39 of medical beds). Interrupted time-series analysis was used to evaluate changes in bed**  
42  
43 **40 occupancy.**

44  
45  
46  
47 **41 Results** There were 116,871 admissions during the study period. Lower bed occupancy in  
48  
49 **42 the rotavirus season in the post-vaccination period was observed for RVGE (-89%, 95%CI**  
50  
51 **43 73%-95%), acute gastroenteritis (-63%, 95%CI 39%-78%) and any infection (-23%, 95%CI**  
52  
53 **44 15%-31%). No significant overall reduction in bed occupancy was observed (-4%, 95%CI -1%-**  
54  
55 **45 9%). No changes were observed for the other outcomes.**  
56  
57  
58  
59  
60

1  
2  
3 46 **Conclusions** Rotavirus vaccine introduction was not associated with reduced hospital  
4  
5  
6 47 pressures. A reduction in RVGE hospitalisation without change in overall bed occupancy  
7  
8 48 suggests that beds available were used for a different patient population, possibly reflecting  
9  
10  
11 49 a previously unmet need.

12  
13 50 **Clinical trials identifier** ClinicalTrials.gov NCT03271593

14  
15 51  
16  
17  
18  
19  
20  
21  
22  
23  
24  
25  
26  
27  
28  
29  
30  
31  
32  
33  
34  
35  
36  
37  
38  
39  
40  
41  
42  
43  
44  
45  
46  
47  
48  
49  
50  
51  
52  
53  
54  
55  
56  
57  
58  
59  
60

For peer review only

1  
2  
3 52 **'Strengths and limitations of this study'**  
4

- 5 53 • This study used 8 years of retrospective routinely collected data from a large  
6  
7  
8 54 paediatric hospital in the United Kingdom.  
9  
10 55 • This is the first study to examine the effects of a vaccine on wider measures of  
11  
12  
13 56 hospital pressures in the United Kingdom.  
14  
15 57 • Our analysis highlights the importance of the presentation of data from the full study  
16  
17  
18 58 period in a time series analysis, rather than restricting the results to a "before-after"  
19  
20  
21 59 comparison.  
22  
23 60 • Our analysis was complicated by inevitable changes in hospital practices over the 8-  
24  
25  
26 61 year study period, in particular changes in patient flow, laboratory procedures,  
27  
28 62 infection control and clinical coding.  
29  
30  
31  
32  
33  
34  
35  
36  
37  
38  
39  
40  
41  
42  
43  
44  
45  
46  
47  
48  
49  
50  
51  
52  
53  
54  
55  
56  
57  
58  
59  
60

## 63 INTRODUCTION

64 In the context of increasing patient need and constrained resources, the United Kingdom's  
65 (UK) National Health Service (NHS) faces growing clinical and financial pressures. Currently,  
66 the NHS is failing to meet targets for urgent, emergency and planned care.[1, 2] Hospital  
67 admission rates have been increasing for the past decade; if the increases continue at the  
68 current rate an extra 22 hospitals with 800 beds each will be required by 2022.[3] Although  
69 highest for the elderly, increases in admission rates are occurring across all age groups.[3] In  
70 children aged 0-14 years, the number of finished consultant episodes increased from 1.7 to  
71 2.0 million between 2004-05 and 2014-15 [4] and emergency department (ED) attendances  
72 have risen by approximately 300,000 between 2011-12 and 2014-15,[5] leaving paediatric  
73 services with increased demand but a short fall of medical staffing.[6]

74 While the problems the NHS faces are complex, there are ongoing disease prevention  
75 mechanisms which can help alleviate some of the burden. Vaccines for example, are the  
76 most effective defence against infectious diseases.[7] For highly efficacious vaccines  
77 targeting childhood diseases with a large hospitalisation burden, it is possible that the  
78 reduction in beds occupied for infections caused by the vaccine target pathogen reduces  
79 hospital pressures, and potentially nosocomial infections.[8, 9]

80 Prior to vaccine introduction in the UK, rotavirus gastroenteritis (RVGE) was a major cause  
81 of hospital admission in young children during the winter/spring months. It was estimated  
82 that in children less than 5 years of age, 20% of ED attendances and 45% of hospitalisations  
83 for acute gastroenteritis (AGE) were due to rotavirus infections.[10] The UK introduced the  
84 monovalent two-dose rotavirus vaccination (*Rotarix*, GSK) into the routine childhood  
85 immunisation schedule in July 2013. Rotavirus vaccine uptake increased rapidly to over 90%  
86 for one dose [11] and early vaccine impact studies suggest a significantly reduced incidence

1  
2  
3 87 of RVGE hospitalisations in children.[7, 12, 13] The aim of this study was to assess hospital  
4  
5  
6 88 pressures at a large UK NHS paediatric hospital pre- and post- rotavirus vaccine introduction  
7  
8 89 using routinely collected data. As there are no direct measures of hospital clinical pressures  
9  
10  
11 90 (on healthcare resources and staff), evidenced proxy indicators were used: bed occupancy,  
12  
13  
14 91 hospital-acquired infection rate, unplanned readmission rate, and rate of outliers (medical  
15  
16 92 patients admitted to surgical wards).  
17  
18  
19 93

For peer review only



## 94 **METHODS**

### 95 **Setting**

96 Alder Hey Children's NHS foundation Trust (Alder Hey) provides primary, secondary and  
97 tertiary care facilities for >200,000 children each year and has approximately 240 inpatient  
98 beds; this study utilized data prior to the opening of a new hospital premises in October  
99 2016. General medicine, general surgery, and a range of specialist services are provided.  
100 There is also a large ED. Patients with a suspected or confirmed RVGE are admitted to a  
101 room within the cubicle areas of one of the general medical wards. If no beds are available  
102 in the general medical wards, cubicle areas in specialized medical wards or surgical wards  
103 are used.

### 104 **Data sources**

105 Retrospective hospital database analysis (ClinicalTrials.gov NCT03271593) was conducted at  
106 Alder Hey. Anonymised bed admission and laboratory data were extracted by the hospital  
107 informatics department from routine patient databases. Patient data were extracted for the  
108 period July 2000 – June 2015; analysis was restricted to the period July 2007 – June 2015  
109 since changes were made to clinical coding in 2006, and bed availability data were only  
110 available from February 2006 onwards.

### 111 **Study population and definitions**

112 We included all inpatients aged 0-14 years admitted between 1<sup>st</sup> July 2007 and 30<sup>th</sup> June  
113 2015, who attended at least one ward other than the ED. Excluded from analysis were any  
114 patients 15 years or older at time of admission, day patients, and those who were admitted  
115 and discharged from the ED or observation unit without attending another ward.

116 Outcomes were calculated for four different patient groups identified through ICD-10  
117 (International Classification of Disease, tenth edition) hospital discharge diagnosis codes:

- 1  
2  
3 118 • *All admissions*  
4  
5  
6 119 • *Any infection:* Admissions coded as any infection (ICD-10 A00-B99 and J09-J22 in any  
7  
8 120 diagnostic code) or as non-infectious gastroenteritis (K52.9).[14]  
9  
10  
11 121 • *Acute gastroenteritis (AGE):* Admissions coded as acute gastroenteritis (ICD-10 A00-  
12  
13 122 A09 in any diagnostic code) or as non-infectious gastroenteritis (K52.9).[14]  
14  
15  
16 123 • *Rotavirus gastroenteritis (RVGE):* Admissions coded as rotavirus gastroenteritis (ICD-  
17  
18 124 10 A08.0 in any diagnostic code) and/or laboratory-confirmed as rotavirus.[14]  
19  
20 125 Laboratory confirmation for RVGE was defined as rotavirus antigen detected by  
21  
22  
23 126 either immunochromatographic test or by enzyme immunoassay in a faecal  
24  
25 127 specimen of a child with AGE. A distinction was made between community-acquired  
26  
27  
28 128 (CA) and hospital-acquired (HA) RVGE: HA RVGE was defined as any patient with a  
29  
30 129 positive test for rotavirus infection with a sample date more than 2 days after  
31  
32  
33 130 admission and no record of diarrhoea or vomiting on admission.[7] Testing for RVGE  
34  
35 131 was done on clinicians' request. The testing policy for RVGE did not change over the  
36  
37  
38 132 study period.

39  
40 133 Diagnosis coding for non-infectious gastroenteritis (ICD-10 K52.9) was included since  
41  
42 134 unspecified gastroenteritis was classified under this code until April 2012.[15]  
43  
44

45 135 The pre-vaccination period was defined as 1<sup>st</sup> July 2007 - 30<sup>th</sup> June 2013; the post  
46  
47 136 vaccination period was defined as 1<sup>st</sup> July 2013 – 30<sup>th</sup> June 2015. The rotavirus season was  
48  
49 137 defined as 1<sup>st</sup> January – 31<sup>st</sup> May; the period when laboratory detection rate in the UK is  
50  
51  
52 138 highest.[16]  
53

#### 54 139 **Outcomes**

55  
56  
57 140 The following outcomes were calculated:  
58  
59  
60

- 1  
2  
3 141 • *Bed occupancy*: number of patients allocated a bed on a specific ward divided by  
4  
5  
6 142 number of available beds at that ward at 12.00 noon. Bed occupancy for any  
7  
8 143 infection, AGE and RVGE were determined using the definitions above. For HA-RVGE,  
9  
10 144 only bed occupancy on the ward where the patient tested positive for rotavirus was  
11  
12  
13 145 included. For CA-RVGE, total hospital stay was attributed to rotavirus. Sensitivity  
14  
15 146 analyses were done with bed availability data collected at 9am and 5pm.
- 17  
18 147 • *HA bloodstream infection rate*: number of HA bloodstream infections per 1,000  
19  
20 148 admissions with length of stay >2 days. We used indicator organisms to describe HA  
21  
22  
23 149 infection: a HA bloodstream infection was defined as identification of methicillin-  
24  
25 150 sensitive *Staphylococcus aureus* or methicillin-resistant *Staphylococcus aureus* or  
26  
27  
28 151 *Escherichia coli* or *Candida* species in a blood sample obtained >2 days after  
29  
30 152 admission.
- 32  
33 153 • *Unplanned readmission*: number of patients with an emergency readmission within 7  
34  
35 154 days after discharge per 1,000 admissions.[8]
- 37  
38 155 • *Outlier rate*: number of medical patients admitted to a surgical ward per 1,000  
39  
40 156 admissions. A medical patient was defined as any patient classified under  
41  
42 157 haematology/oncology, general paediatrics, endocrinology, nephrology,  
43  
44  
45 158 rheumatology, respiratory medicine, dermatology or accident & emergency.

47 159 Calculations of bed occupancy, HA infection rate, and unplanned readmission rate were  
48  
49 160 restricted to nine general medical wards. Several wards opened or closed during the study  
50  
51  
52 161 period. Changes in ward structure were taken into account in the outcomes calculated by  
53  
54  
55 162 including data according to the wards' opening periods.

## 163 **Descriptive analysis**

1  
2  
3 164 Data analyses were performed using R version 3.2.0 (R Core Team, Vienna). The number of  
4  
5  
6 165 admissions for each patient group, length of stay and age of RVGE patients was described  
7  
8 166 pre and post-vaccine introduction during the rotavirus season. Differences between  
9  
10 167 continuous variables were tested using Student's t-test or Wilcoxon rank-sum test if not  
11  
12  
13 168 normally distributed and  $\chi^2$ -test or Fisher's exact test for categorical variables.

### 15 169 **Statistical analysis**

17  
18 170 To assess the impact of rotavirus vaccine introduction on bed occupancy, interrupted time-  
19  
20 171 series analysis was used as previously described.[7] Monthly expected bed occupancy was  
21  
22  
23 172 estimated by fitting a negative binomial regression model to pre-vaccine monthly bed  
24  
25 173 occupancy data, adjusted for seasonality and secular trends using calendar month and  
26  
27 174 rotavirus year (July to June), respectively. A negative binomial model was chosen to account  
28  
29  
30 175 for overdispersion in the data. This model was used to predict the expected bed occupancy  
31  
32  
33 176 rate in the absence of vaccination, where the impact of vaccination is expressed by the  
34  
35 177 difference between the expected and observed bed occupancy. To quantify change in  
36  
37 178 average bed occupancy in the rotavirus season as a result of introduction of the vaccine, a  
38  
39  
40 179 second model included a binary indicator variable for the vaccine period, enabling the  
41  
42 180 computation of risk ratios (RR) and associated 95% confidence intervals (CI). This second  
43  
44  
45 181 model was restricted to the rotavirus season and adjusted for calendar month and rotavirus  
46  
47 182 year. Percentage change in average bed occupancy was calculated as  $100(1 - RR)$ .

### 49 183 **Ethics**

50  
51  
52 184 Ethics approval was provided by the NHS Research Ethics Committee, North East –  
53  
54 185 Newcastle & North Tyneside 2 and by the Alder Hey Children's NHS Foundation Trust  
55  
56  
57 186 Research and Development Department.

## 187 **RESULTS**

188 In total, there were 116,871 admissions among 68,838 unique patients at any time in the  
189 year during the study period from 1<sup>st</sup> July 2007 – 30<sup>th</sup> June 2015. Of those admissions,  
190 48,852 occurred during the rotavirus season.

191 Testing for rotavirus remained stable throughout the pre-vaccination study period, with a  
192 mean of 513 (standard deviation 36) admissions tested each rotavirus season, of which 138  
193 (26.9%) were positive (Figure 1). In the rotavirus seasons following rotavirus vaccine  
194 introduction, the proportion of rotavirus-positive test results amongst admissions tested  
195 dropped to 3.8% (13/338) and 5.9% (16/272) in 2014 and 2015 respectively.

196 The median age of patients with RVGE was 11 months in the pre-vaccination period, and 22  
197 months in the post-vaccination period ( $p=0.06$ ). Median length of hospital stay for patients  
198 with CA RVGE did not differ between the pre- and post-vaccination period (2.2 vs. 2.4 days,  
199  $p=0.89$ ). Median length of stay from RVGE diagnosis to discharge for patients with HA RVGE  
200 was not significantly different between the pre- and post-vaccination period (8.5 days pre  
201 vs. 5.0 days post,  $p=0.88$ ) (Figure 2).

202 Length of stay for all admissions was highest during the respiratory virus season in  
203 November/December and slightly increased from 2007 to 2012 ( $p<0.001$ ) (Supplementary  
204 Figure 1). No significant change in length of stay for all admissions was observed for the  
205 period 2012 to 2015 ( $p=0.21$ ).

### 206 **Bed occupancy**

207 Figure 3 shows the average monthly bed occupancy for general medical wards for all  
208 admissions, admissions with a diagnosis of any infection, and admissions with a diagnosis of  
209 RVGE. Bed occupancy for AGE is shown in Supplementary Figure 2. Clear seasonal patterns  
210 were observed for total bed occupancy, with highest overall bed occupancy for the

1  
2  
3 211 respiratory virus season in November/December, and lowest overall bed occupancy in the  
4  
5  
6 212 summer months. A year-on-year increase was observed for overall bed occupancy over the  
7  
8 213 study period ( $p<0.001$ ), from 79% bed occupancy in December 2007 to 90% in December  
9  
10 214 2014.

11  
12  
13 215 Bed occupancy for RVGE showed clear seasonal peaks before introduction of the vaccine,  
14  
15 216 with highest occupancy shown for February/March. After introduction of the rotavirus  
16  
17  
18 217 vaccine, bed occupancy for RVGE in the rotavirus season was reduced by 89% (95%CI 73% –  
19  
20 218 95%) (Table 1). Bed occupancy for any infectious disease increased year on year in the pre-  
21  
22  
23 219 vaccination period, both within and outside the rotavirus season ( $p<0.001$  and  $p<0.001$   
24  
25 220 respectively), as did bed occupancy for AGE ( $p<0.001$  within,  $p=0.04$  outside rotavirus  
26  
27  
28 221 season). Post introduction of the vaccine, observed bed occupancy for AGE in the rotavirus  
29  
30 222 season was reduced by 63% (95%CI 39% - 78%) after adjustment for the positive trend in  
31  
32  
33 223 the pre-vaccination period. Observed bed occupancy for any infection in the rotavirus  
34  
35 224 season was reduced by 23% (95%CI 15% - 31%). No significant reduction was observed  
36  
37  
38 225 when considering observed vs. expected bed occupancy for any cause of admission (decline  
39  
40 226 4%, 95%CI -1% - 9%). Sensitivity analyses with bed availability data taken at 9am and 5pm  
41  
42 227 provided the similar results.  
43  
44  
45  
46  
47  
48  
49  
50  
51  
52  
53  
54  
55  
56  
57  
58  
59  
60

228 **Table 1:** Average monthly bed occupancy and decline in bed occupancy comparing the pre-  
 229 and post-rotavirus vaccination period for any admission, any infection, acute gastroenteritis  
 230 and rotavirus gastroenteritis on general medical wards in Alder Hey NHS Foundation Trust,  
 231 July 2007 – June 2015.

| Variable                   | Average bed occupancy       |                    | Crude Risk ratio (95% CI) | Adjusted Risk ratio (95% CI) <sup>1</sup> | Decline in bed occupancy (95% CI) | P-value |
|----------------------------|-----------------------------|--------------------|---------------------------|-------------------------------------------|-----------------------------------|---------|
|                            | in rotavirus season (range) | (range)            |                           |                                           |                                   |         |
|                            | Pre-vaccination n           | Post-vaccination n |                           |                                           |                                   |         |
| All                        | 77%<br>(70% - 85%)          | 79%<br>(67% - 87%) | 1.03<br>(0.99 - 1.08)     | 0.96<br>(0.91 - 1.01)                     | 4%<br>(-1% - 9%)                  | 0.15    |
| Any infection <sup>2</sup> | 39%<br>(25% - 56%)          | 42%<br>(33% - 51%) | 1.09<br>(0.95 - 1.25)     | 0.77<br>(0.69 - 0.85)                     | 23%<br>(15% - 31%)                | <0.001  |
| AGE <sup>2</sup>           | 5%<br>(1% - 16%)            | 3%<br>(1% - 8%)    | 0.72<br>(0.45 - 1.13)     | 0.37<br>(0.22 - 0.61)                     | 63%<br>(39% - 78%)                | <0.001  |
| RVGE <sup>3</sup>          | 5%<br>(0% - 17%)            | 1%<br>(0% - 4%)    | 0.18<br>(0.09 - 0.35)     | 0.11<br>(0.05 - 0.27)                     | 89%<br>(73% - 95%)                | <0.001  |

232 AGE: acute gastroenteritis; CI: confidence interval; NHS: National Health Service; RVGE:  
 233 rotavirus gastroenteritis.

234 <sup>1</sup> Adjusted for seasonality and secular trend. <sup>2</sup> Diagnosis of any infection and AGE by clinical

1  
2  
3 235 coding only.<sup>3</sup> Diagnosis of RVGE by clinical coding and laboratory results.  
4  
5

6 236  
7

8 237 **Hospital-acquired (HA) bloodstream infection rate**  
9

10 238 A decrease in HA bloodstream infection was observed in the post-vaccination period,  
11  
12  
13 239 although this did not appear different from secular trends in the pre-vaccination period  
14  
15 240 (Figure 4).  
16

17  
18 241 **Unplanned readmission rate**  
19

20 242 No difference was observed between the unplanned readmission rate in the pre-vaccination  
21  
22  
23 243 period and the post-vaccination period (Figure 5).  
24

25 244 **Outlier rate**  
26

27 245 Clear seasonal patterns were observed for the outlier rate, with the highest peak during the  
28  
29  
30 246 respiratory virus season in November/December, and a secondary peak during the rotavirus  
31  
32 247 season in January-May (Figure 6). The outlier rate increased in 2012, and remained high  
33  
34  
35 248 throughout 2013-2015, both within and outside the rotavirus season. The increase in outlier  
36  
37 249 rate is synchronous with the closure of one specific ward, a large general medical ward in  
38  
39  
40 250 November 2011, and the opening of a new medical admission unit (short-stay department  
41  
42 251 prior to discharge or admission to other wards).  
43  
44  
45  
46  
47  
48  
49  
50  
51  
52  
53  
54  
55  
56  
57  
58  
59  
60



**DISCUSSION**

This is the first study to examine the effects of national vaccine introduction on wider measures of hospital pressures in the UK. The introduction of rotavirus vaccine has led to a large reduction in RVGE hospitalisation,[7] reflected in the reduction in proportion of admissions tested rotavirus-positive and the reduction in bed occupancy due to RVGE and AGE as described here. Lower bed occupancy for RVGE and AGE in the rotavirus season post-vaccine introduction was concordant with lower bed occupancy for any infection in the rotavirus season in the post-vaccination period. Despite the reduction in RVGE hospitalisation, overall bed occupancy was not reduced. This suggests that a large, busy NHS Trust, such as Alder Hey, operates at full capacity and that the beds that became available by the reduction of RVGE hospitalisations were occupied by a different patient population, probably reflecting a previously unmet need and/or physicians having greater freedom to admit patients if beds have become available. The absence of a reduction in overall bed occupancy could explain why reductions in the other proxy measures (HA-infection rate, unplanned readmission rate, outlier rate) were not observed.

Two other studies have examined hospital pressures since rotavirus vaccination introduction. A study conducted in two Finnish hospitals concluded that bed occupancy for RVGE and AGE decreased since introduction of the vaccine.[17] There is no discussion of the impact of vaccine introduction on the total bed occupancy, or on other proxy measures for hospital pressures. A study conducted in a general hospital in Belgium (36 paediatric beds) concluded that bed-day occupancy, bed-day turnover and unplanned readmissions for AGE were lower in the post-vaccination compared with the pre-vaccination periods, and that this resulted in improved quality of care for overall admissions.[8] In our study, the reduction of bed occupancy for RVGE did not result in a change in overall bed occupancy or other

1  
2  
3 276 measures of hospital pressure. No change in hospital length of stay for RVGE patients was  
4  
5  
6 277 observed. Median hospital stay for CA RVGE was shorter in Alder Hey NHS Foundation Trust  
7  
8 278 than reported in the Belgian study (2.2 vs. 4.1 days), suggesting a difference in management  
9  
10  
11 279 of RVGE cases, and could be an indicator of higher hospital pressure and more rapid patient  
12  
13 280 turnover in Alder Hey.

14  
15 281 Several caveats need to be considered when using routinely collected data. Our analysis was  
16  
17  
18 282 complicated by changes in hospital practises, in particular changes in patient flow,  
19  
20  
21 283 laboratory procedures, infection control and clinical coding. Firstly, several wards relevant  
22  
23 284 to this study opened or closed during the study period. Although ward closures were  
24  
25 285 accounted for in the bed occupancy analysis, more subtle changes in patient dynamics still  
26  
27  
28 286 influenced our results. A steep increase was observed for the outlier rate in 2012, with the  
29  
30  
31 287 higher level sustained throughout 2013-2015. The increase in outlier rate is synchronous  
32  
33 288 with the closure of a large general medical ward in November 2011, and the opening of a  
34  
35 289 new medical admission. It is possible that the change in ward structure led to an increased  
36  
37  
38 290 bed usage in surgical and specialised medical wards.

39  
40 291 Secondly, several changes in laboratory procedures were observed during the study period,  
41  
42  
43 292 most notably the introduction of polymerase chain reaction for the rapid testing of  
44  
45 293 respiratory pathogens in 2013. Faster diagnosis of respiratory infection could have had  
46  
47  
48 294 implications for patient treatment, isolation practices and patient flow, and could have  
49  
50 295 influenced the measured hospital pressure outcomes. The number of admissions tested for  
51  
52 296 rotavirus did not change significantly over the study period, which provides confidence that  
53  
54  
55 297 the drop in RVGE in the post-vaccine era is a real effect, and not caused by a change in  
56  
57 298 testing policy.  
58  
59  
60

1  
2  
3 299 Thirdly, there were changes in infection prevention and control (IPC) practices in later years  
4  
5  
6 300 of the study, including an increase in IPC staff; the introduction of isolation and hand  
7  
8 301 hygiene posters, bed space dividers screens and infection control enclosure isolation pods;  
9  
10 302 and changes in environmental cleaning. Changes in IPC practices will most likely have  
11  
12  
13 303 resulted in changes in HA infection rates – it is difficult to disentangle their effect on HA  
14  
15 304 infection from any effect due to a reduction in hospital pressures post-rotavirus vaccination  
16  
17  
18 305 introduction.

19  
20 306 We observed that bed occupancy for any infectious disease increased in the pre-vaccination  
21  
22  
23 307 period, both within and outside the rotavirus season. An increase in bed occupancy for any  
24  
25 308 respiratory infection (supplementary Figure 3) and any gastroenteritis was observed, but  
26  
27  
28 309 neither increase can fully account for the overall increase in any infection. It is possible that  
29  
30 310 the increase in infection observed is due to an artefact of the recording of the data.

31  
32  
33 311 Supplementary Figure 4 shows that all clinical diagnostic coding increased over the study  
34  
35 312 period. Clinical diagnostic coding increased for both cases with and without any infection  
36  
37  
38 313 recorded. We observed that bed occupancy for any infection in the rotavirus season was  
39  
40 314 lower than the expected bed occupancy for any infection based on pre-vaccination  
41  
42 315 estimates. The increase in any clinical diagnostic coding was sustained in 2014 and 2015,  
43  
44  
45 316 providing confidence that our observation of lower than expected bed occupancy for any  
46  
47 317 infection in the post-vaccination period is a true finding.

48  
49 318 Our analysis highlights the importance of the presentation of data from the full study period  
50  
51  
52 319 in a time-series analysis, rather than restricting the results to a “before-after” comparison,  
53  
54  
55 320 when there is non-homogeneity in disease management, hospital management and data  
56  
57 321 collection over time. A long-term increase in bed occupancy for any infection could be  
58  
59 322 observed (possibly due to an increase in clinical coding) that predated the introduction of  
60

1  
2  
3 323 vaccination: taking this ongoing increase in admissions coded as infection into account, a  
4  
5  
6 324 reduction in bed occupancy for any infection can be observed.  
7

8 325 Routinely collected hospital data can be used for the evaluation of a (vaccination) policy, but  
9  
10 326 our study highlights the difficulty of evaluating a (vaccination) policy in a period with  
11  
12  
13 327 concurrent changes in patient flow, laboratory procedures and IPC practices.  
14

15 328 The introduction of rotavirus vaccination has led to a dramatic reduction in hospitalisation  
16  
17 329 for RVGE and thus a reduction in bed occupancy for RVGE. However, overall bed occupancy  
18  
19  
20 330 was not reduced further highlighting the severe strain the NHS is under and that demand is  
21  
22  
23 331 outstripping capacity. Bed occupancy continues to rise and even a highly effective routine  
24  
25 332 vaccine only freed-up beds which were then filled by admissions, making no overall  
26  
27  
28 333 headway into reducing the overall pressures the NHS is facing.  
29

30 334  
31  
32  
33  
34  
35  
36  
37  
38  
39  
40  
41  
42  
43  
44  
45  
46  
47  
48  
49  
50  
51  
52  
53  
54  
55  
56  
57  
58  
59  
60

1  
2  
3 335 **ACKNOWLEDGMENTS**  
4

5  
6 336 **Financial support**  
7

8 337 GlaxoSmithKline Biologicals SA funded this study (NCT03271593) and was involved in all  
9  
10 338 stages of study conduct. GlaxoSmithKline Biologicals SA also took in charge all costs  
11  
12  
13 339 associated with the development and publication of this manuscript.  
14

15 340 **Conflicts of interest**  
16

17  
18  
19 341 Rotarix is a trademark of the GSK group of companies.  
20  
21

22  
23 342 NC, NF, and DH are in receipt of research grant support from the GSK group of companies  
24

25 343 for the conduct of the present study. NC has received honoraria for participation in GSK  
26

27 344 Rotavirus Vaccine Advisory Board Meetings from the GSK group of companies and from  
28

29  
30 345 Watermark Research Partners for participation in independent data monitoring committee  
31

32 346 of GSK-sponsored clinical trials of Rotavirus vaccine. NC and NF's institution received grant  
33

34 347 from the GSK group of companies for the conduct of other analysis, not related to the  
35

36 348 present work. DH received grants from the GSK group of companies and Sanofi Pasteur, and  
37

38 349 Merck & Co., Inc. (Kenilworth, NJ USA) outside the submitted work. NBZ reports grants from  
39

40 350 the GSK group of companies and from Takeda Pharmaceuticals outside the submitted work.  
41

42 351 BS and ET are employees of the GSK group of companies. EH, RC, MC and JC have nothing to  
43

44  
45 352 disclose.  
46  
47  
48  
49

50 353 **Authorship and manuscript preparation**  
51

52  
53  
54 354 DH, RPDC, MC, NC, NF designed the study and wrote the protocol. EH performed the  
55

56 355 analyses and wrote the manuscript. JSC and MC provided data for the study. NBZ provided  
57

58 356 statistical support. DH, RPDC, MC, JSC, NBZ, NF, NAC provided advice on the understanding  
59  
60

1  
2  
3 357 of the findings. ET and BS provided external advice. All authors approved the final version of  
4  
5  
6 358 the paper for submission.

7  
8 359 Authors would like to thank Business & Decision Life Sciences platform for editorial  
9  
10 360 assistance and manuscript coordination, on behalf of GSK. Stephanie Garcia coordinated  
11  
12  
13 361 manuscript development and editorial support.

### 14 15 362 **Acknowledgements**

16  
17  
18 363 We thank Karl Edwardson, Christine Gerrard, Fiona Hardiman, Carly Quirk and Stephanie  
19  
20 364 Longmuir for their contribution in preparing the datasets required for this study.

### 21 22 23 365 **Data sharing**

24  
25 366 The results summary for this study (GSK study identifier: 205369 - ClinicalTrials.gov  
26  
27 367 identifier: NCT03271593) is available on the GSK Clinical Study Register and can be accessed  
28  
29  
30 368 at [www.gsk-clinicalstudyregister.com](http://www.gsk-clinicalstudyregister.com).

1  
2  
3 369 **References**  
4

- 5  
6 370 1. Limb M. NHS misses key performance targets again in June. *BMJ* 2016;354:i4442.  
7  
8 371 2. O'Dowd A. NHS winter pressures are becoming an all year reality, warn experts. *BMJ*  
9  
10 372 2016;354:i4907.  
11  
12  
13 373 3. Smith P, McKeon A, Blunt I, et al. NHS hospitals under pressure: trends in acute activity up  
14  
15 374 to 2022: Nuffield Trust, 2014.  
16  
17  
18 375 4. Hospital Episode Statistics Analysis - Health and Social Care Information Centre. Hospital  
19  
20 376 Episode Statistics - Admitted Patient Care, England - 2014-15, 2015.  
21  
22  
23 377 5. Health and Social Care Information Centre. Hospital Episode Statistics – NHS Accident and  
24  
25 378 Emergency Attendances in England - 2014-15. 2016.  
26  
27  
28 379 6. Torjesen I. Paediatric services can't fill rotas. *BMJ* 2016;354:i4495.  
29  
30 380 7. Hungerford D, Read JM, Cooke RP, et al. Early impact of rotavirus vaccination in a large  
31  
32 381 paediatric hospital in the UK. *J Hosp Infect* 2016;93(2):117-20.  
33  
34  
35 382 8. Standaert B, Alwan A, Strens D, et al. Improvement in hospital Quality of Care (QoC) after  
36  
37 383 the introduction of rotavirus vaccination: An evaluation study in Belgium. *Hum*  
38  
39 384 *Vaccin Immunother* 2015;11(9):2266-73.  
40  
41  
42 385 9. Forster AJ, Stiell I, Wells G, et al. The effect of hospital occupancy on emergency  
43  
44 386 department length of stay and patient disposition. *Acad Emerg Med* 2003;10(2):127-  
45  
46 387 33.  
47  
48  
49 388 10. Harris JP, Jit M, Cooper D, et al. Evaluating rotavirus vaccination in England and Wales.  
50  
51 389 Part I. Estimating the burden of disease. *Vaccine* 2007;25(20):3962-70.  
52  
53  
54 390 11. Public Health England. National rotavirus immunisation programme: preliminary data for  
55  
56 391 England, February 2016 to July 2016. *HPR* 2016;10(32).  
57  
58  
59  
60

- 1  
2  
3 392 12. Atchison CJ, Stowe J, Andrews N, et al. Rapid Declines in Age Group-Specific Rotavirus  
4  
5  
6 393 Infection and Acute Gastroenteritis Among Vaccinated and Unvaccinated Individuals  
7  
8 394 Within 1 Year of Rotavirus Vaccine Introduction in England and Wales. *J Infect Dis*  
9  
10 395 2016;213(2):243-9.  
11  
12  
13 396 13. Hungerford D, Vivancos R, Read JM, et al. Rotavirus vaccine impact and socioeconomic  
14  
15 397 deprivation: an interrupted time-series analysis of gastrointestinal disease outcomes  
16  
17 398 across primary and secondary care in the UK. *BMC Med* 2018;16(1):10.  
19  
20 399 14. World Health Organisation. International Statistical Classification of Diseases and  
21  
22 400 Related Health Problems - 10th revision. 1992.  
23  
24  
25 401 15. Wilson SE, Deeks SL, Rosella LC. Importance of ICD-10 coding directive change for acute  
26  
27 402 gastroenteritis (unspecified) for rotavirus vaccine impact studies: illustration from a  
28  
29 403 population-based cohort study from Ontario, Canada. *BMC Res Notes* 2015;8:439.  
30  
31  
32 404 16. Hungerford D, Vivancos R, Read JM, et al. In-season and out-of-season variation of  
33  
34 405 rotavirus genotype distribution and age of infection across 12 European countries  
35  
36 406 before the introduction of routine vaccination, 2007/08 to 2012/13. *Euro Surveill*  
37  
38 407 2016;21(2).  
39  
40  
41  
42 408 17. Hartwig S, Uhari M, Renko M, et al. Hospital bed occupancy for rotavirus and all cause  
43  
44 409 acute gastroenteritis in two Finnish hospitals before and after the implementation of  
45  
46 410 the national rotavirus vaccination program with RotaTeq(R). *BMC Health Serv Res*  
47  
48 411 2014;14:632.  
49  
50  
51  
52  
53 412  
54  
55 413  
56  
57  
58  
59  
60



1  
2  
3 414 **Figures Captions**  
4

5 415 **Figure 1. Number of admissions tested for rotavirus in the rotavirus season in Alder Hey**  
6  
7  
8 416 **NHS Foundation Trust, July 2007 – June 2015.**

9  
10 417 *NHS: National Health Service.*  
11

12  
13 418 **Figure 2. Total length of stay for CA and HA RVGE.**

14  
15 419 For HA RVGE, length of stay was calculated from date of first positive test.

16  
17 420 *CA: community-acquired; HA: hospital-acquired.*  
18

19  
20 421 **Figure 3. Observed and expected bed occupancy for any admission, any infection and**  
21  
22  
23 422 **rotavirus gastroenteritis on general medical wards in Alder Hey NHS Foundation Trust,**  
24  
25 423 **July 2007 – June 2015.**

26  
27 424 The coloured shading represents the 95% confidence intervals for the expected incidence.

28  
29 425 Grey shading represents the rotavirus season (January-May). The vertical hashed line

30  
31 426 represents the introduction of rotavirus vaccine in the UK in July 2013.

32  
33 427 *NHS: National Health Service.*  
34

35  
36  
37 428 **Figure 4. Hospital acquired bloodstream infection rate on general medical wards in Alder**  
38  
39 429 **Hey NHS Foundation Trust, July 2007 – June 2015.**

40  
41 430 Black line shows raw data, red line shows smoothed data. Grey shading represents the

42  
43 431 rotavirus season (January-May). The vertical hashed line represents the introduction of

44  
45 432 rotavirus vaccine in the UK in July 2013.

46  
47 433 *HA: hospital-acquired; NHS: National Health Service.*  
48

49  
50 434 **Figure 5. Unplanned readmission rate for any admission on general medical wards in Alder**  
51  
52  
53 435 **Hey NHS Foundation Trust, July 2007 – June 2015.**

54  
55 436 Raw data in black, smoothed data in red. Grey shading represents the rotavirus season

56  
57 437 (January-May). The vertical hashed line represents the introduction of rotavirus vaccine in  
58  
59  
60

1  
2  
3 438 the UK in July 2013.  
4

5  
6 439 *NHS: National Health Service.*  
7

8 440 **Figure 6. Outlier rate for any admission in Alder Hey NHS Foundation Trust, July 2007 –**  
9

10 441 **June 2015.**  
11

12  
13 442 Raw data in black, smoothed data in red. Grey shading represents the rotavirus season  
14

15 443 (January-May). The vertical hashed line represents the introduction of rotavirus vaccine in  
16

17  
18 444 the UK in July 2013.  
19

20 445 *NHS: National Health Service.*  
21

22  
23 446  
24

25 447  
26  
27  
28  
29  
30  
31  
32  
33  
34  
35  
36  
37  
38  
39  
40  
41  
42  
43  
44  
45  
46  
47  
48  
49  
50  
51  
52  
53  
54  
55  
56  
57  
58  
59  
60

1  
2  
3  
4  
5  
6  
7  
8  
9  
10  
11  
12  
13  
14  
15  
16  
17  
18  
19  
20  
21  
22  
23  
24  
25  
26  
27  
28  
29  
30  
31  
32  
33  
34  
35  
36  
37  
38  
39  
40  
41  
42  
43  
44  
45  
46  
47  
48  
49  
50  
51  
52  
53  
54  
55  
56  
57  
58  
59  
60

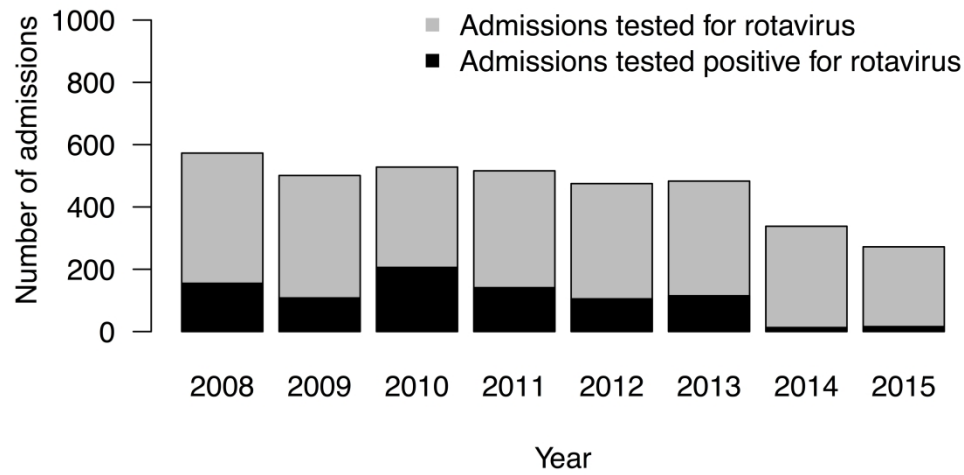

Figure 1. Number of admissions tested for rotavirus in the rotavirus season in Alder Hey NHS Foundation Trust, July 2007 – June 2015. NHS: National Health Service.

169x96mm (600 x 600 DPI)

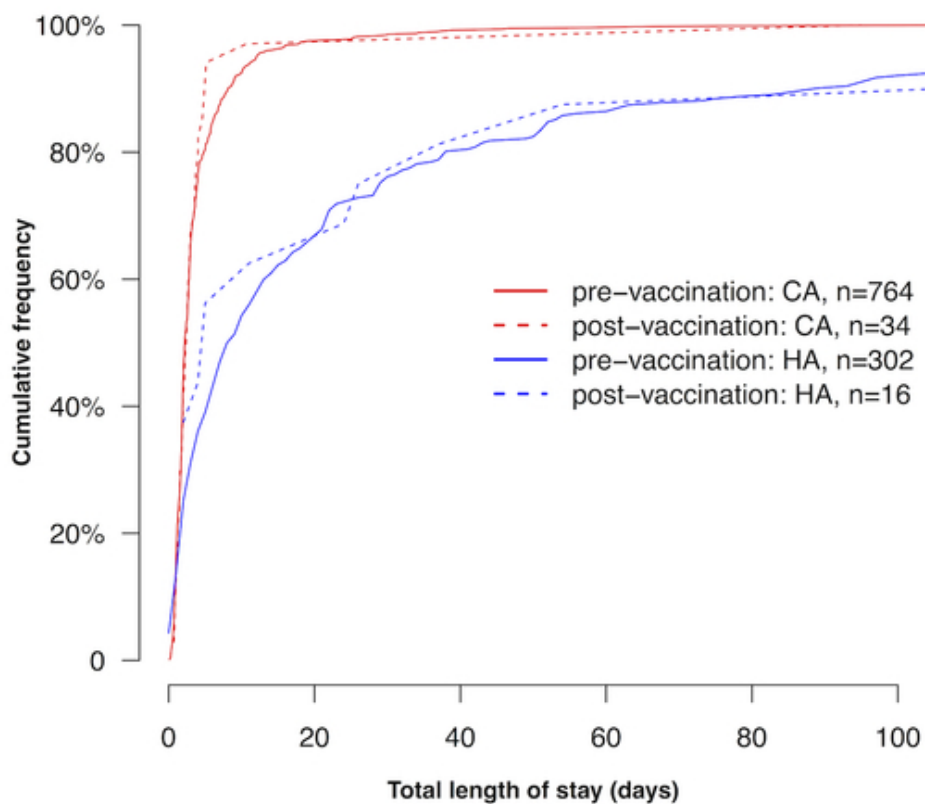

**Figure 2. Total length of stay for CA and HA RVGE.**

For HA RVGE, length of stay was calculated from date of first positive test.  
*CA: community-acquired; HA: hospital-acquired.*

22x22mm (600 x 600 DPI)

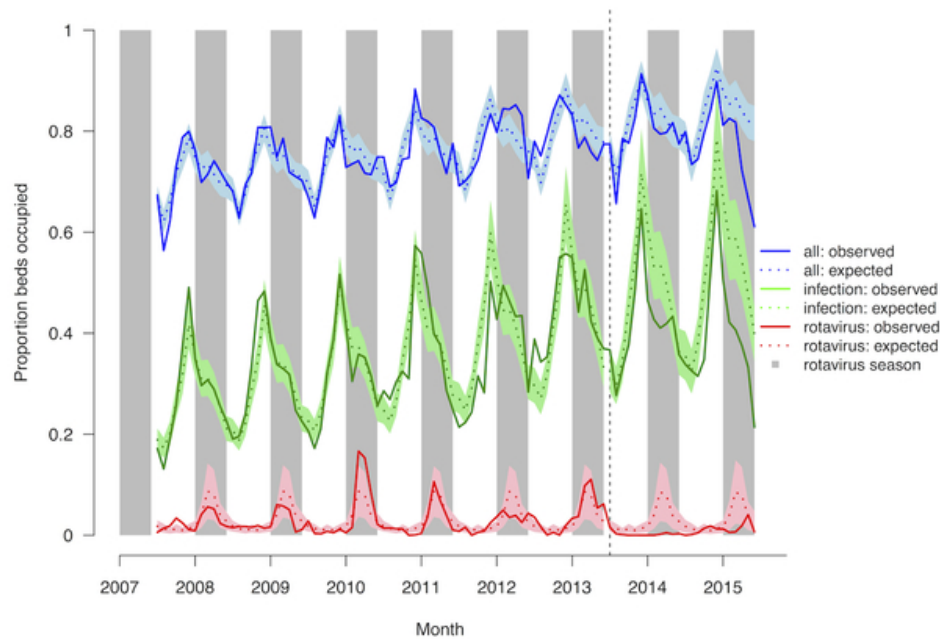

**Figure 3. Observed and expected bed occupancy for any admission, any infection and rotavirus gastroenteritis on general medical wards in Alder Hey NHS Foundation Trust, July 2007 – June 2015.**

The coloured shading represents the 95% confidence intervals for the expected incidence. Grey shading represents the rotavirus season (January-May). The vertical hashed line represents the introduction of rotavirus vaccine in the UK in July 2013.

*NHS: National Health Service.*

27x17mm (600 x 600 DPI)

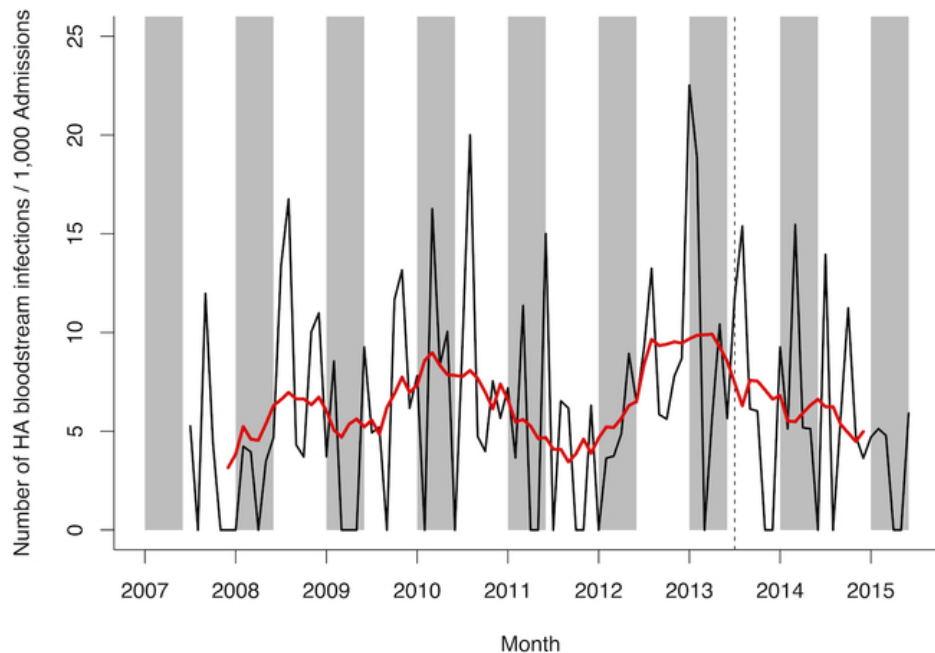

**Figure 4. Hospital acquired bloodstream infection rate on general medical wards in Alder Hey NHS Foundation Trust, July 2007 – June 2015.**

Black line shows raw data, red line shows smoothed data. Grey shading represents the rotavirus season (January-May). The vertical hashed line represents the introduction of rotavirus vaccine in the UK in July 2013.

*HA: hospital-acquired; NHS: National Health Service.*

29x22mm (600 x 600 DPI)

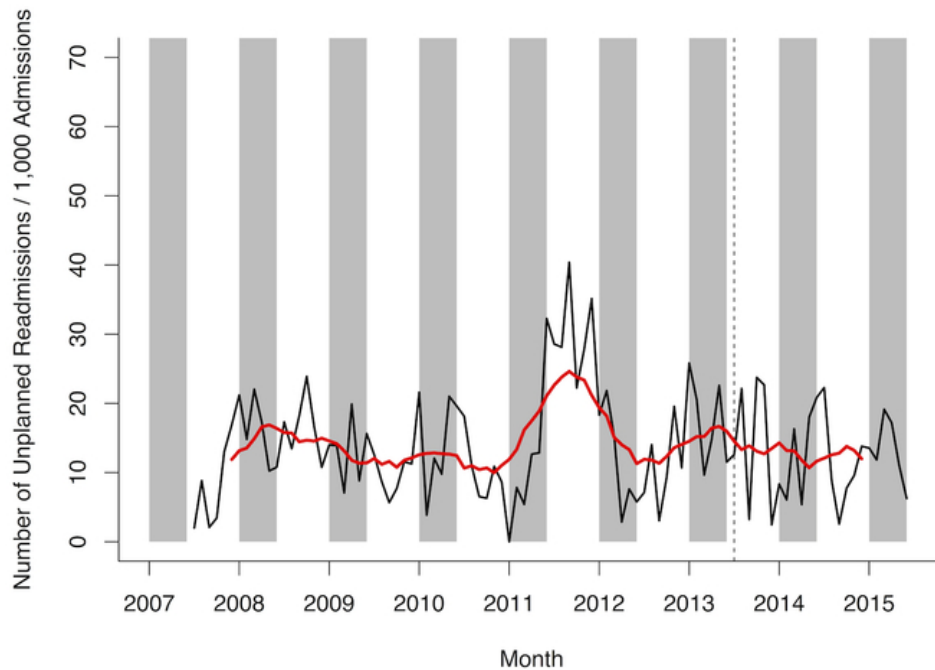

**Figure 5. Unplanned readmission rate for any admission on general medical wards in Alder Hey NHS Foundation Trust, July 2007 – June 2015.**

Raw data in black, smoothed data in red. Grey shading represents the rotavirus season (January-May). The vertical hashed line represents the introduction of rotavirus vaccine in the UK in July 2013.

*NHS: National Health Service.*

29x22mm (600 x 600 DPI)

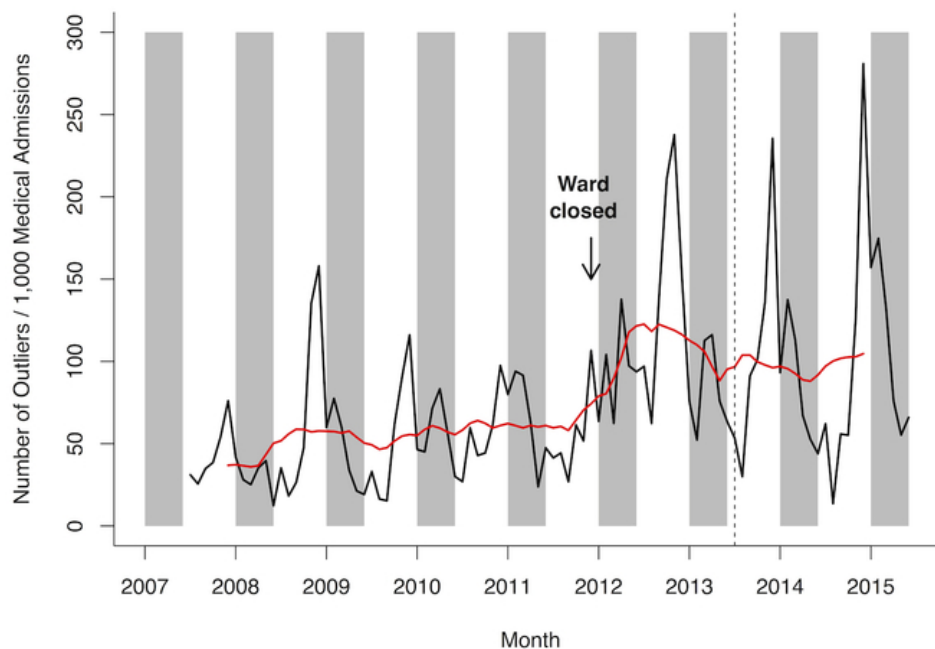

**Figure 6. Outlier rate for any admission in Alder Hey NHS Foundation Trust, July 2007 – June 2015.**

Raw data in black, smoothed data in red. Grey shading represents the rotavirus season (January-May). The vertical hashed line represents the introduction of rotavirus vaccine in the UK in July 2013.

*NHS: National Health Service.*

29x22mm (600 x 600 DPI)



## 1 Supplementary Material

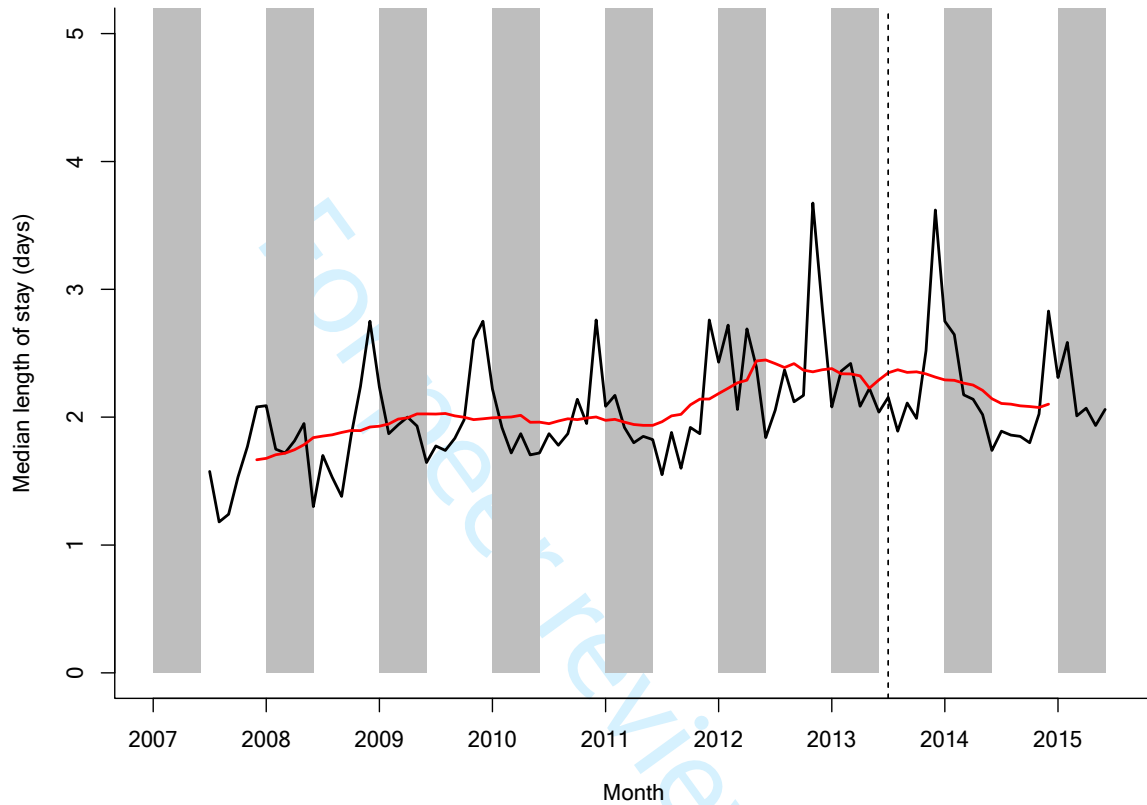

2

3 **Supplementary Figure 1. Median length of stay (all admissions) on general medical wards in Alder**  
 4 **Hey Children's NHS Foundation Trust, July 2007 – June 2015.** Raw data in black, smoothed data in  
 5 red. Grey shading represents the rotavirus season (January-May). The vertical hashed line represents  
 6 the introduction of rotavirus vaccine in the UK in July 2013.

7 *NHS: National Health Service.*

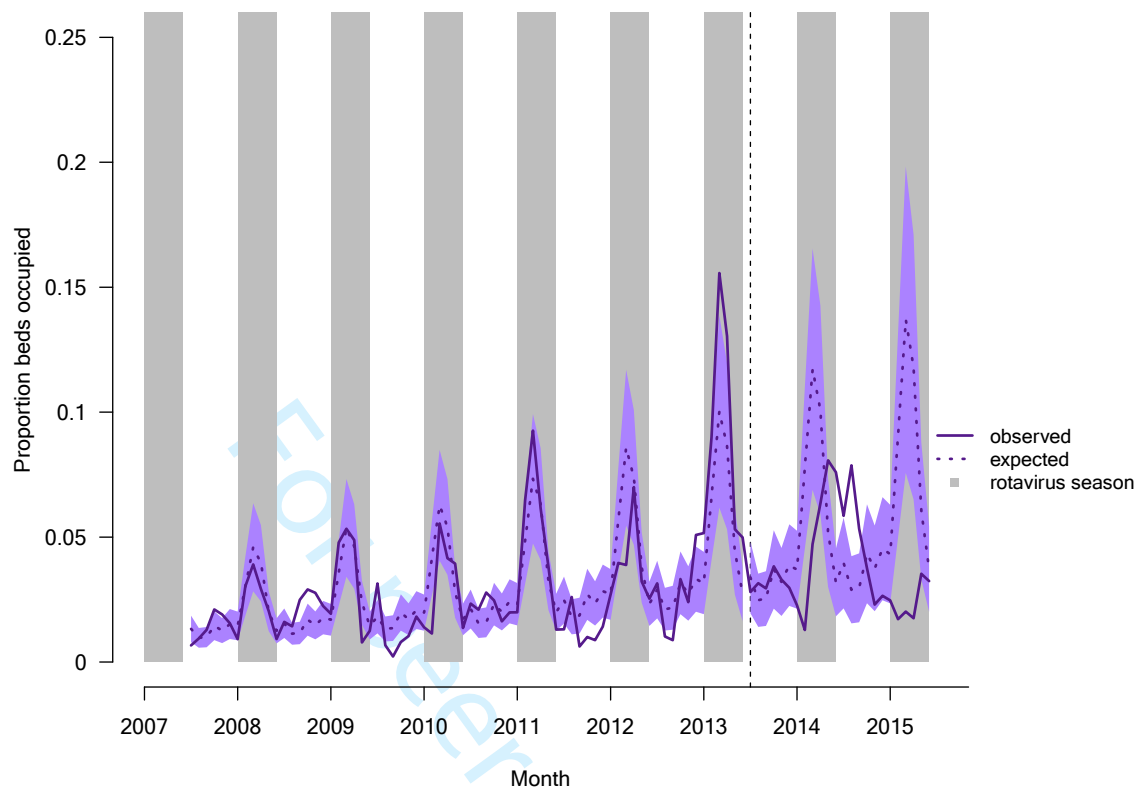

1

2 **Supplementary Figure 2. Observed and expected bed occupancy for acute gastroenteritis on**  
 3 **general medical wards in Alder Hey NHS Foundation Trust, July 2007 – June 2015.** The coloured  
 4 shading represents the 95% confidence intervals for the expected incidence. Grey shading  
 5 represents the rotavirus season (January-May). The vertical hashed line represents the introduction  
 6 of rotavirus vaccine in the UK in July 2013.

7 *NHS: National Health Service.*

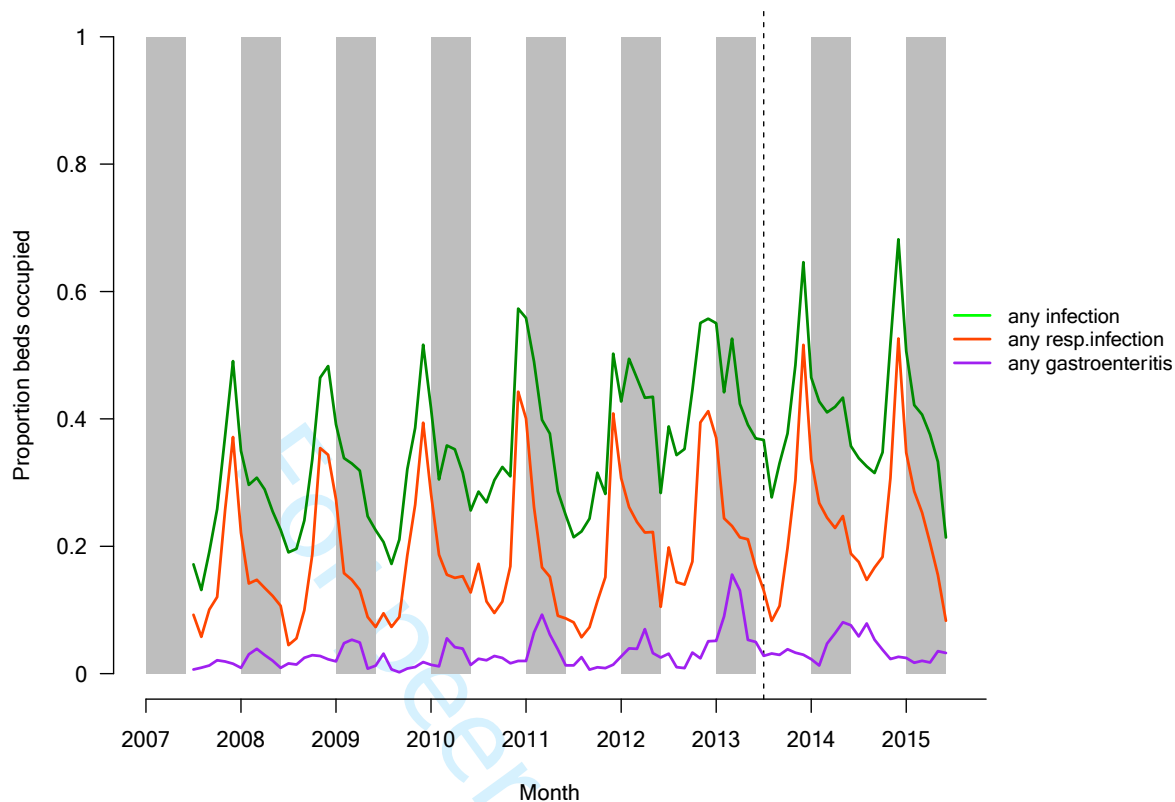

1

2 **Supplementary Figure 3. Observed bed occupancy for any infection, any respiratory infection and**  
 3 **any gastroenteritis (by clinical coding only) in general medical wards in Alder Hey NHS Foundation**  
 4 **Trust, July 2007 – June 2015.** The vertical hashed line represents the introduction of rotavirus  
 5 vaccine in the UK in July 2013.

6 *NHS: National Health Service; resp.: respiratory.*

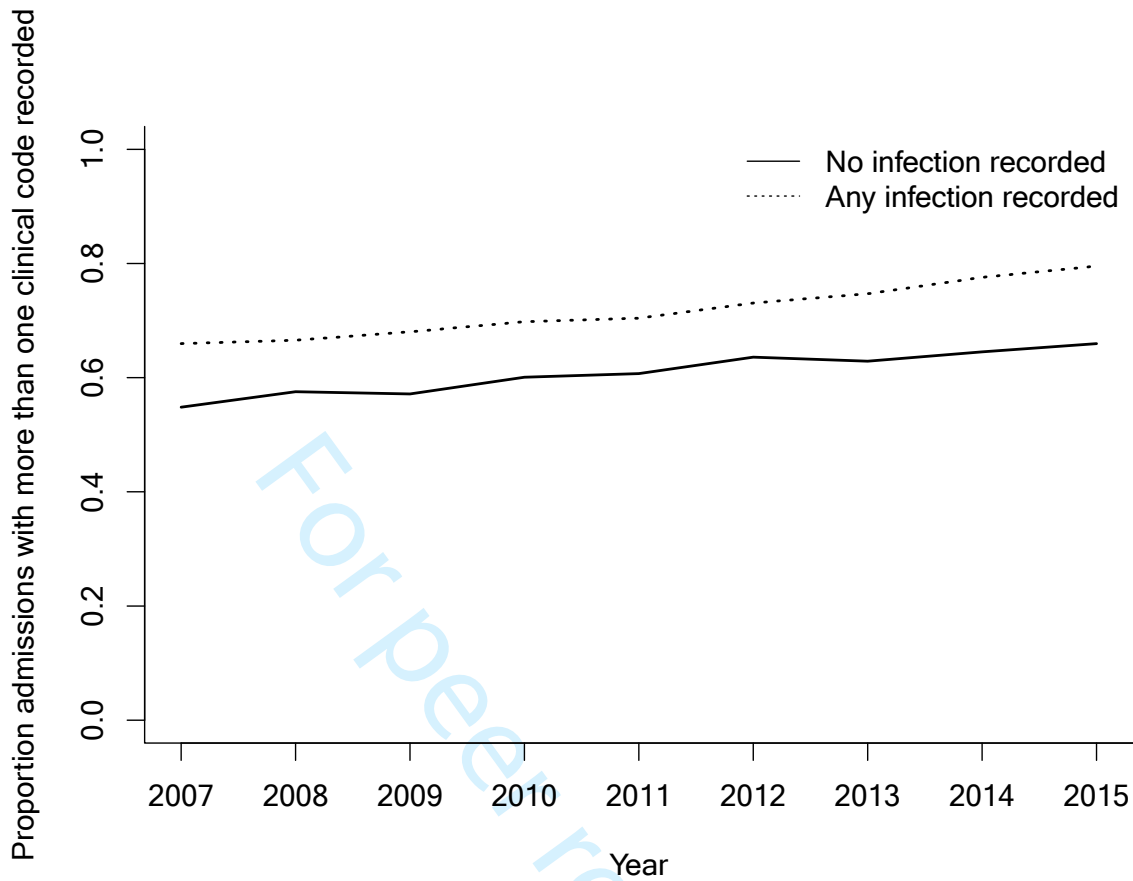

1

2 **Supplementary Figure 4. Proportion of admissions to general medical wards for whom more than**  
 3 **one clinical code was recorded, Alder Hey NHS Foundation Trust, July 2007 – June 2015**

4 *NHS: National Health Service.*

STROBE Statement—checklist of items that should be included in reports of observational studies

|                           | Item No | Recommendation                                                                                                                                                                                                                                                                                                                                                                                                                                                         | Checklist                                                                                                                                                                             |
|---------------------------|---------|------------------------------------------------------------------------------------------------------------------------------------------------------------------------------------------------------------------------------------------------------------------------------------------------------------------------------------------------------------------------------------------------------------------------------------------------------------------------|---------------------------------------------------------------------------------------------------------------------------------------------------------------------------------------|
| <b>Title and abstract</b> | 1       | (a) Indicate the study’s design with a commonly used term in the title or the abstract                                                                                                                                                                                                                                                                                                                                                                                 | Included “Retrospective hospital database analysis” in abstract                                                                                                                       |
|                           |         | (b) Provide in the abstract an informative and balanced summary of what was done and what was found                                                                                                                                                                                                                                                                                                                                                                    | Included                                                                                                                                                                              |
| <b>Introduction</b>       |         |                                                                                                                                                                                                                                                                                                                                                                                                                                                                        |                                                                                                                                                                                       |
| Background/rationale      | 2       | Explain the scientific background and rationale for the investigation being reported                                                                                                                                                                                                                                                                                                                                                                                   | Included                                                                                                                                                                              |
| Objectives                | 3       | State specific objectives, including any prespecified hypotheses                                                                                                                                                                                                                                                                                                                                                                                                       | Included “The aim of this study was to assess hospital pressures at a large UK NHS paediatric hospital pre- and post- rotavirus vaccine introduction using routinely collected data.” |
| <b>Methods</b>            |         |                                                                                                                                                                                                                                                                                                                                                                                                                                                                        |                                                                                                                                                                                       |
| Study design              | 4       | Present key elements of study design early in the paper                                                                                                                                                                                                                                                                                                                                                                                                                | Included in paragraph ‘data sources’                                                                                                                                                  |
| Setting                   | 5       | Describe the setting, locations, and relevant dates, including periods of recruitment, exposure, follow-up, and data collection                                                                                                                                                                                                                                                                                                                                        | Included in paragraph ‘setting’                                                                                                                                                       |
| Participants              | 6       | (a) <i>Cohort study</i> —Give the eligibility criteria, and the sources and methods of selection of participants. Describe methods of follow-up<br><i>Case-control study</i> —Give the eligibility criteria, and the sources and methods of case ascertainment and control selection. Give the rationale for the choice of cases and controls<br><i>Cross-sectional study</i> —Give the eligibility criteria, and the sources and methods of selection of participants | Inclusion and exclusion criteria included in paragraph ‘study population and definitions’                                                                                             |
|                           |         | (b) <i>Cohort study</i> —For matched studies, give matching criteria and number of exposed and unexposed<br><i>Case-control study</i> —For matched studies, give matching criteria and the number of controls per case                                                                                                                                                                                                                                                 | Not applicable for this observational study                                                                                                                                           |
| Variables                 | 7       | Clearly define all outcomes, exposures, predictors, potential confounders, and effect modifiers. Give diagnostic criteria, if applicable                                                                                                                                                                                                                                                                                                                               | Included in paragraphs ‘study population and definitions’ and ‘outcomes’                                                                                                              |
| Data sources/             | 8*      | For each variable of interest, give sources of data and details of methods of assessment                                                                                                                                                                                                                                                                                                                                                                               | Included in paragraph ‘data sources’.                                                                                                                                                 |

|                        |    |                                                                                                                                                                                                                                                                                                           |                                                                                                                                                                                                                                                     |
|------------------------|----|-----------------------------------------------------------------------------------------------------------------------------------------------------------------------------------------------------------------------------------------------------------------------------------------------------------|-----------------------------------------------------------------------------------------------------------------------------------------------------------------------------------------------------------------------------------------------------|
| measurement            |    | (measurement). Describe comparability of assessment methods if there is more than one group                                                                                                                                                                                                               |                                                                                                                                                                                                                                                     |
| Bias                   | 9  | Describe any efforts to address potential sources of bias                                                                                                                                                                                                                                                 | - 2007 onwards data only included to account for changes in clinical coding (included in paragraph 'data sources')<br>- inclusion of diagnosis coding for non-infectious gastroenteritis (included in paragraph 'study population and definitions') |
| Study size             | 10 | Explain how the study size was arrived at                                                                                                                                                                                                                                                                 | Sampling not applicable: this observational study included <i>all</i> patients aged 0-14 years                                                                                                                                                      |
| Quantitative variables | 11 | Explain how quantitative variables were handled in the analyses. If applicable, describe which groupings were chosen and why                                                                                                                                                                              | Included in paragraphs 'outcomes' and 'statistical analysis'.                                                                                                                                                                                       |
| Statistical methods    | 12 | (a) Describe all statistical methods, including those used to control for confounding                                                                                                                                                                                                                     | Included in paragraphs 'outcomes' and 'statistical analysis'.                                                                                                                                                                                       |
|                        |    | (b) Describe any methods used to examine subgroups and interactions                                                                                                                                                                                                                                       | Included in paragraphs 'outcomes' and 'statistical analysis'.                                                                                                                                                                                       |
|                        |    | (c) Explain how missing data were addressed                                                                                                                                                                                                                                                               | Not applicable for hospital database analysis                                                                                                                                                                                                       |
|                        |    | (d) <i>Cohort study</i> —If applicable, explain how loss to follow-up was addressed<br><i>Case-control study</i> —If applicable, explain how matching of cases and controls was addressed<br><i>Cross-sectional study</i> —If applicable, describe analytical methods taking account of sampling strategy | Not applicable for observational study                                                                                                                                                                                                              |
|                        |    | (e) Describe any sensitivity analyses                                                                                                                                                                                                                                                                     | Not applicable                                                                                                                                                                                                                                      |

Continued on next page

1  
2  
3  
4  
5  
6  
7  
8  
9  
10  
11  
12  
13  
14  
15  
16  
17  
18  
19  
20  
21  
22  
23  
24  
25  
26  
27  
28  
29  
30  
31  
32  
33  
34  
35  
36  
37  
38  
39  
40  
41  
42  
43  
44  
45  
46

| <b>Results</b>    |     |                                                                                                                                                                                                              |                                                                                                                                                   |
|-------------------|-----|--------------------------------------------------------------------------------------------------------------------------------------------------------------------------------------------------------------|---------------------------------------------------------------------------------------------------------------------------------------------------|
| Participants      | 13* | (a) Report numbers of individuals at each stage of study—eg numbers potentially eligible, examined for eligibility, confirmed eligible, included in the study, completing follow-up, and analysed            | Included in first paragraph of results                                                                                                            |
|                   |     | (b) Give reasons for non-participation at each stage                                                                                                                                                         | Not applicable                                                                                                                                    |
|                   |     | (c) Consider use of a flow diagram                                                                                                                                                                           | Not applicable                                                                                                                                    |
| Descriptive data  | 14* | (a) Give characteristics of study participants (eg demographic, clinical, social) and information on exposures and potential confounders                                                                     | Median age of participants included. Median length of stay of participants included                                                               |
|                   |     | (b) Indicate number of participants with missing data for each variable of interest                                                                                                                          | Not applicable                                                                                                                                    |
|                   |     | (c) <i>Cohort study</i> —Summarise follow-up time (eg, average and total amount)                                                                                                                             | Not applicable                                                                                                                                    |
| Outcome data      | 15* | <i>Cohort study</i> —Report numbers of outcome events or summary measures over time                                                                                                                          | Not applicable                                                                                                                                    |
|                   |     | <i>Case-control study</i> —Report numbers in each exposure category, or summary measures of exposure                                                                                                         | Not applicable                                                                                                                                    |
|                   |     | <i>Cross-sectional study</i> —Report numbers of outcome events or summary measures                                                                                                                           | Not applicable                                                                                                                                    |
| Main results      | 16  | (a) Give unadjusted estimates and, if applicable, confounder-adjusted estimates and their precision (eg, 95% confidence interval). Make clear which confounders were adjusted for and why they were included | Unadjusted estimates included in figures 1-6.<br>Adjusted analysis for bed occupancy included in Table 1.                                         |
|                   |     | (b) Report category boundaries when continuous variables were categorized                                                                                                                                    | Not applicable                                                                                                                                    |
|                   |     | (c) If relevant, consider translating estimates of relative risk into absolute risk for a meaningful time period                                                                                             | Risk ratio translated in decline in bed occupancy in Table 1                                                                                      |
| Other analyses    | 17  | Report other analyses done—eg analyses of subgroups and interactions, and sensitivity analyses                                                                                                               | - Analysis of clinical coding included in Supplementary figure 4<br>- Analysis of bed occupancy for infection included in Supplementary figure 3. |
| <b>Discussion</b> |     |                                                                                                                                                                                                              |                                                                                                                                                   |
| Key results       | 18  | Summarise key results with reference to study objectives                                                                                                                                                     | Included in first paragraph discussion and conclusions                                                                                            |
| Limitations       | 19  | Discuss limitations of the study, taking into account sources of potential bias or imprecision. Discuss both direction and magnitude of any potential bias                                                   | Included in discussion                                                                                                                            |
| Interpretation    | 20  | Give a cautious overall interpretation of results considering objectives, limitations,                                                                                                                       | Included in discussion                                                                                                                            |

1  
2  
3  
4  
5  
6  
7  
8

|                  |    |                                                                                                                                                               |                               |
|------------------|----|---------------------------------------------------------------------------------------------------------------------------------------------------------------|-------------------------------|
|                  |    | multiplicity of analyses, results from similar studies, and other relevant evidence                                                                           |                               |
| Generalisability | 21 | Discuss the generalisability (external validity) of the study results                                                                                         | Included in discussion        |
| Funding          | 22 | Give the source of funding and the role of the funders for the present study and, if applicable, for the original study on which the present article is based | Included in Funding Statement |

9  
10 \*Give information separately for cases and controls in case-control studies and, if applicable, for exposed and unexposed groups in cohort and cross-sectional studies.

11  
12 **Note:** An Explanation and Elaboration article discusses each checklist item and gives methodological background and published examples of transparent reporting. The STROBE  
13 checklist is best used in conjunction with this article (freely available on the Web sites of PLoS Medicine at <http://www.plosmedicine.org/>, Annals of Internal Medicine at  
14 <http://www.annals.org/>, and Epidemiology at <http://www.epidem.com/>). Information on the STROBE Initiative is available at [www.strobe-statement.org](http://www.strobe-statement.org).  
15  
16  
17  
18  
19  
20  
21  
22  
23  
24  
25  
26  
27  
28  
29  
30  
31  
32  
33  
34  
35  
36  
37  
38  
39  
40  
41  
42  
43  
44  
45  
46



# BMJ Open

## Do hospital pressures change following rotavirus vaccine introduction? A retrospective database analysis in a large paediatric hospital in the United Kingdom.

|                                 |                                                                                                                                                                                                                                                                                                                                                                                                                                                                                                                                                                                                                                                                                                                                                                                                                                                                                                                                                                                                                                                                                                                                                                  |
|---------------------------------|------------------------------------------------------------------------------------------------------------------------------------------------------------------------------------------------------------------------------------------------------------------------------------------------------------------------------------------------------------------------------------------------------------------------------------------------------------------------------------------------------------------------------------------------------------------------------------------------------------------------------------------------------------------------------------------------------------------------------------------------------------------------------------------------------------------------------------------------------------------------------------------------------------------------------------------------------------------------------------------------------------------------------------------------------------------------------------------------------------------------------------------------------------------|
| Journal:                        | <i>BMJ Open</i>                                                                                                                                                                                                                                                                                                                                                                                                                                                                                                                                                                                                                                                                                                                                                                                                                                                                                                                                                                                                                                                                                                                                                  |
| Manuscript ID                   | bmjopen-2018-027739.R1                                                                                                                                                                                                                                                                                                                                                                                                                                                                                                                                                                                                                                                                                                                                                                                                                                                                                                                                                                                                                                                                                                                                           |
| Article Type:                   | Research                                                                                                                                                                                                                                                                                                                                                                                                                                                                                                                                                                                                                                                                                                                                                                                                                                                                                                                                                                                                                                                                                                                                                         |
| Date Submitted by the Author:   | 21-Jan-2019                                                                                                                                                                                                                                                                                                                                                                                                                                                                                                                                                                                                                                                                                                                                                                                                                                                                                                                                                                                                                                                                                                                                                      |
| Complete List of Authors:       | Heinsbroek, Ellen; University of Liverpool, Department of Clinical Infection, Microbiology & Immunology, Institute of Infection and Global Health<br>Hungerford, Daniel; University of Liverpool, Department of Clinical Infection, Microbiology & Immunology, Institute of Infection and Global Health; Public Health England, Field Service – North West, National Infection Service<br>Cooke, Richard; Alder Hey Children's NHS Foundation Trust<br>Chowdhury, Margaret; Alder Hey Children's NHS Foundation Trust<br>Cargill, James; Alder Hey Children's NHS Foundation Trust<br>Bar-Zeev, Naor; Johns Hopkins University Bloomberg School of Public Health, International Vaccine Access Center<br>French, Neil; University of Liverpool, Department of Clinical Infection, Microbiology & Immunology, Institute of Infection and Global Health<br>Theodorou, Eleni; GSK Pharma, Health Economics<br>Standaert, Baudouin; GSK Vaccines, Health Economics; a,<br>Cunliffe, Nigel; University of Liverpool, Department of Clinical Infection, Microbiology & Immunology, Institute of Infection and Global Health; Alder Hey Children's NHS Foundation Trust |
| <b>Primary Subject Heading</b>: | Health services research                                                                                                                                                                                                                                                                                                                                                                                                                                                                                                                                                                                                                                                                                                                                                                                                                                                                                                                                                                                                                                                                                                                                         |
| Secondary Subject Heading:      | Epidemiology, Infectious diseases, Paediatrics, Medical management, Gastroenterology and hepatology                                                                                                                                                                                                                                                                                                                                                                                                                                                                                                                                                                                                                                                                                                                                                                                                                                                                                                                                                                                                                                                              |
| Keywords:                       | Paediatric infectious disease & immunisation < PAEDIATRICS, nosocomial infections, Hospital, Epidemiology < INFECTIOUS DISEASES, Rotavirus, Quality in health care < HEALTH SERVICES ADMINISTRATION & MANAGEMENT                                                                                                                                                                                                                                                                                                                                                                                                                                                                                                                                                                                                                                                                                                                                                                                                                                                                                                                                                 |
|                                 |                                                                                                                                                                                                                                                                                                                                                                                                                                                                                                                                                                                                                                                                                                                                                                                                                                                                                                                                                                                                                                                                                                                                                                  |

SCHOLARONE™  
Manuscripts

1 **1 Do hospital pressures change following rotavirus vaccine introduction? A retrospective**  
2  
3  
4 **2 database analysis in a large paediatric hospital in the United Kingdom.**

5  
6 3 Ellen Heinsbroek<sup>a</sup>; Daniel Hungerford<sup>a</sup>; Richard PD Cooke<sup>b</sup>; Margaret Chowdhury<sup>c</sup>; James S  
7  
8 4 Cargill<sup>b</sup>; Naor Bar-Zeev<sup>a</sup>; Neil French<sup>a</sup>; Eleni Theodorou<sup>d</sup>; Baudouin Standaert<sup>e</sup>; Nigel A  
9  
10 5 Cunliffe<sup>a,b</sup>

11  
12  
13 6 <sup>a</sup> Centre for Global Vaccine Research, Institute of Infection and Global Health, University of  
14  
15  
16 7 Liverpool, Liverpool, UK

17  
18 8 <sup>b</sup> Department of Microbiology, Alder Hey Children's NHS Foundation Trust, Liverpool, UK

19  
20  
21 9 <sup>c</sup> Patient Flow, Alder Hey Children's NHS Foundation Trust, Liverpool, UK

22  
23 10 <sup>d</sup> GSK, Uxbridge, UK

24  
25  
26 11 <sup>e</sup> GSK, Wavre, Belgium

27  
28 **12 Corresponding author:**

29  
30  
31 13 Nigel A Cunliffe

32  
33 14 Institute of Infection and Global Health

34  
35 15 University of Liverpool, Ronald Ross Building,

36  
37  
38 16 8 West Derby Street, Liverpool L69 7BE

39  
40  
41 17 United Kingdom

42  
43 18 +44 (0)151 795 9660;

44  
45 19 nigelc@liverpool.ac.uk

46  
47  
48 20 **Abbreviated title:** Hospital pressures post rotavirus vaccination

49  
50 21 **Word count:** 3248

51  
52 **22 ABSTRACT**

53  
54  
55 23 **Objective** Hospitals in the United Kingdom are under increasing clinical and financial  
56  
57 24 pressures. Post introduction of childhood rotavirus vaccination in the UK in 2013, rotavirus  
58  
59 25 gastroenteritis (RVGE) hospitalisations reduced significantly. We evaluated changes in

1  
2  
3  
4  
5  
6  
7  
8  
9  
10  
11  
12  
13  
14  
15  
16  
17  
18  
19  
20  
21  
22  
23  
24  
25  
26  
27  
28  
29  
30  
31  
32  
33  
34  
35  
36  
37  
38  
39  
40  
41  
42  
43  
44  
45  
46  
47  
48  
49  
50  
51  
52  
53  
54  
55  
56  
57  
58  
59  
60

26 'hospital pressures' (demand on healthcare resources and staff) following rotavirus vaccine  
27 introduction in a paediatric setting in the UK.

28 **Design** Retrospective hospital database analysis between July 2007 and June 2015.

29 **Setting** A large paediatric hospital providing primary, secondary and tertiary care in  
30 Merseyside, UK.

31 **Participants** Hospital admissions aged < 15 years. Outcomes were calculated for four  
32 different patient groups identified through diagnosis coding (ICD-10) and/or laboratory  
33 confirmation: all admissions; any infection, acute gastroenteritis; and RVGE.

34 **Methods** Hospital pressures were compared before and after rotavirus vaccine  
35 introduction: these included bed occupancy, hospital-acquired infection rate, unplanned  
36 readmission rate, and outlier rate (medical patients admitted to surgical wards due to lack  
37 of medical beds). Interrupted time-series analysis was used to evaluate changes in bed  
38 occupancy.

39 **Results** There were 116,871 admissions during the study period. Lower bed occupancy in  
40 the rotavirus season in the post-vaccination period was observed for RVGE (-89%, 95%CI  
41 73%,95%), acute gastroenteritis (-63%, 95%CI 39%,78%) and any infection (-23%, 95%CI  
42 15%,31%). No significant overall reduction in bed occupancy was observed (-4%, 95%CI -  
43 1%,9%). No changes were observed for the other outcomes.

44 **Conclusions** Rotavirus vaccine introduction was not associated with reduced hospital  
45 pressures. A reduction in RVGE hospitalisation without change in overall bed occupancy  
46 suggests that beds available were used for a different patient population, possibly reflecting  
47 a previously unmet need.

48 **Clinical trials identifier** ClinicalTrials.gov NCT03271593

1  
2 50 **'Strengths and limitations of this study'**

- 3  
4 51 • This study used 8 years of retrospective routinely collected data from a large  
5  
6 52 paediatric hospital in the United Kingdom.  
7  
8 53 • This is the first study to examine the effects of a vaccine on wider measures of  
9  
10 54 hospital pressures in the United Kingdom.  
11  
12 55 • Our analysis highlights the importance of the presentation of data from the full study  
13  
14 56 period in a time series analysis, rather than restricting the results to a "before-after"  
15  
16 57 comparison.  
17  
18 58 • Our analysis was complicated by inevitable changes in hospital practices over the 8-  
19  
20 59 year study period, in particular changes in patient flow, laboratory procedures,  
21  
22 60 infection control and clinical coding.  
23  
24  
25  
26  
27  
28  
29  
30  
31  
32  
33  
34  
35  
36  
37  
38  
39  
40  
41  
42  
43  
44  
45  
46  
47  
48  
49  
50  
51  
52  
53  
54  
55  
56  
57  
58  
59  
60

## 61 INTRODUCTION

62 In the context of increasing patient need and constrained resources, the United Kingdom's  
63 (UK) National Health Service (NHS) faces growing clinical and financial pressures. Currently,  
64 the NHS is failing to meet targets for urgent, emergency and planned care.[1, 2] Hospital  
65 admission rates have been increasing for the past decade; if the increases continue at the  
66 current rate an extra 22 hospitals with 800 beds each will be required by 2022.[3] Although  
67 highest for the elderly, increases in admission rates are occurring across all age groups.[3] In  
68 children aged 0-14 years, the number of hospital admission episodes increased from 1.7 to  
69 2.0 million between 2004-05 and 2014-15 [4] and emergency department (ED) attendances  
70 have risen by approximately 300,000 between 2011-12 and 2014-15,[5] leaving paediatric  
71 services with increased demand but a short fall of medical staffing.[6]

72 While the problems the NHS faces are complex, there are ongoing disease prevention  
73 mechanisms which can help alleviate some of the burden. Vaccines for example, are the  
74 most effective defence against infectious diseases.[7] For highly efficacious vaccines  
75 targeting childhood diseases with a large hospitalisation burden, it is possible that the  
76 reduction in beds occupied for infections caused by the vaccine target pathogen reduces  
77 hospital pressures, and potentially nosocomial infections.[8, 9]

78 Prior to vaccine introduction in the UK, rotavirus gastroenteritis (RVGE) was a major cause  
79 of hospital admission in young children during the winter/spring months. It was estimated  
80 that in children less than 5 years of age, 20% of ED attendances and 45% of hospitalisations  
81 for acute gastroenteritis (AGE) were due to rotavirus infections.[10] The UK introduced the  
82 monovalent two-dose rotavirus vaccination (*Rotarix*, GSK) into the routine childhood  
83 immunisation schedule in July 2013. Rotavirus vaccine uptake increased rapidly to over 90%  
84 for one dose [11] and early vaccine impact studies suggest a significantly reduced incidence  
85 of RVGE hospitalisations in children.[7, 12, 13] The aim of this study was to assess hospital

1 86 pressures at a large UK NHS paediatric hospital pre- and post- rotavirus vaccine introduction  
2  
3  
4 87 using routinely collected data. As there are no direct measures of hospital clinical pressures  
5  
6 88 (on healthcare resources and staff), evidenced proxy indicators were used: bed occupancy,  
7  
8  
9 89 hospital-acquired infection rate, unplanned readmission rate, and rate of outliers (medical  
10  
11 90 patients admitted to surgical wards).  
12  
13  
14 91  
15  
16  
17  
18  
19  
20  
21  
22  
23  
24  
25  
26  
27  
28  
29  
30  
31  
32  
33  
34  
35  
36  
37  
38  
39  
40  
41  
42  
43  
44  
45  
46  
47  
48  
49  
50  
51  
52  
53  
54  
55  
56  
57  
58  
59  
60

For peer review only

## 92 **METHODS**

### 93 **Setting**

94 Alder Hey Children's NHS foundation Trust (Alder Hey) is located in Liverpool, UK and is one  
95 of the largest paediatric hospitals in Europe, with a catchment population of over 7.1  
96 million. Alder Hey provides primary, secondary and tertiary care facilities for >200,000  
97 children each year and has approximately 240 inpatient beds; this study utilized data prior  
98 to the opening of a new hospital premises in October 2016. General medicine, general  
99 surgery, and a range of specialist services are provided. There is also a large ED. Patients  
100 with a suspected or confirmed RVGE are admitted to a room within the cubicle areas of one  
101 of the general medical wards. If no beds are available in the general medical wards, cubicle  
102 areas in specialized medical wards or surgical wards are used.

### 103 **Data sources**

104 Retrospective hospital database analysis (ClinicalTrials.gov NCT03271593) was conducted at  
105 Alder Hey. Anonymised bed admission and laboratory data were extracted by the hospital  
106 informatics department from routine patient databases. Patient data were extracted for the  
107 period July 2000 – June 2015; analysis was restricted to the period July 2007 – June 2015  
108 since changes were made to clinical coding in 2006, and bed availability data were only  
109 available from February 2006 onwards.

### 110 **Study population and definitions**

111 We included all inpatients aged 0-14 years admitted between 1<sup>st</sup> July 2007 and 30<sup>th</sup> June  
112 2015, who attended at least one ward other than the ED. Excluded from analysis were any  
113 patients 15 years or older at time of admission, day patients, and those who were admitted  
114 and discharged from the ED or observation unit without attending another ward.

115 Outcomes were calculated for four different patient groups identified through ICD-10  
116 (International Classification of Disease, tenth edition) hospital discharge diagnosis codes:

- 1 117 • *All admissions*
- 2
- 3
- 4 118 • *Any infection:* Admissions coded as any infection (ICD-10 A00-B99 and J09-J22 in any
- 5
- 6 119 diagnostic code) or as non-infectious gastroenteritis (K52.9).[14]
- 7
- 8
- 9 120 • *Acute gastroenteritis (AGE):* Admissions coded as acute gastroenteritis (ICD-10 A00-
- 10
- 11 121 A09 in any diagnostic code) or as non-infectious gastroenteritis (K52.9).[14]
- 12
- 13
- 14 122 • *Rotavirus gastroenteritis (RVGE):* Admissions coded as rotavirus gastroenteritis (ICD-
- 15
- 16 123 10 A08.0 in any diagnostic code) and/or laboratory-confirmed as rotavirus.[14]
- 17
- 18 Laboratory confirmation for RVGE was defined as rotavirus antigen detected by
- 19 124
- 20
- 21 125 either immunochromatographic test or by enzyme immunoassay in a faecal
- 22
- 23
- 24 126 specimen of a child with AGE. A distinction was made between community-acquired
- 25
- 26 127 (CA) and hospital-acquired (HA) RVGE: HA RVGE was defined as any patient with a
- 27
- 28 128 positive test for rotavirus infection with a sample date more than 2 days after
- 29
- 30
- 31 129 admission and no record of diarrhoea or vomiting on admission.[7] Testing for RVGE
- 32
- 33 130 was done on clinicians' request. The testing policy for RVGE did not change over the
- 34
- 35
- 36 131 study period.

37

38 132 Diagnosis coding for non-infectious gastroenteritis (ICD-10 K52.9) was included since

39

40

41 133 unspecified gastroenteritis was classified under this code until April 2012.[15]

42

43 134 The pre-vaccination period was defined as 1<sup>st</sup> July 2007 - 30<sup>th</sup> June 2013; the post

44

45 135 vaccination period was defined as 1<sup>st</sup> July 2013 – 30<sup>th</sup> June 2015. The rotavirus season was

46

47

48 136 defined as 1<sup>st</sup> January – 31<sup>st</sup> May; the period when laboratory detection rate in the UK is

49

50 137 highest.[16]

51

## 52 138 **Outcomes**

53

54

55 139 The following outcomes were calculated:

56

57

58

59

60



- 1  
2 140 • *Bed occupancy*: number of patients allocated a bed on a specific ward divided by  
3  
4 141 number of available beds at that ward at 12.00 noon. Bed occupancy for any  
5  
6 142 infection, AGE and RVGE were determined using the definitions above. For HA-RVGE,  
7  
8 143 only bed occupancy on the ward where the patient tested positive for rotavirus was  
9  
10 144 included. For CA-RVGE, total hospital stay was attributed to rotavirus. Sensitivity  
11  
12 145 analyses were done with bed availability data collected at 9am and 5pm.  
13  
14  
15  
16 146 • *HA bloodstream infection rate*: number of HA bloodstream infections per 1,000  
17  
18 147 admissions with length of stay >2 days. We used indicator organisms to describe HA  
19  
20 148 infection: a HA bloodstream infection was defined as identification of methicillin-  
21  
22 149 sensitive *Staphylococcus aureus* or methicillin-resistant *Staphylococcus aureus* or  
23  
24 150 *Escherichia coli* or *Candida* species in a blood sample obtained >2 days after  
25  
26 151 admission. HA Bloodstream infection rate was used as an outcome measure since, as  
27  
28 152 for other outcome measures such as HA rotavirus, this may be an indicator of how  
29  
30 153 changes in hospital pressures could influence infection control practices and  
31  
32 154 subsequent nosocomial transmission.  
33  
34  
35  
36  
37  
38 155 • *Unplanned readmission*: number of patients with an emergency readmission within 7  
39  
40 156 days after discharge per 1,000 admissions.[8]  
41  
42  
43 157 • *Outlier rate*: number of medical patients admitted to a surgical ward per 1,000  
44  
45 158 admissions. A medical patient was defined as any patient classified under  
46  
47 159 haematology/oncology, general paediatrics, endocrinology, nephrology,  
48  
49 160 rheumatology, respiratory medicine, dermatology or accident & emergency.  
50  
51  
52

53 161 Calculations of bed occupancy, HA infection rate, and unplanned readmission rate were  
54  
55 162 restricted to nine general medical wards. Several wards opened or closed during the study  
56  
57  
58  
59  
60

1 163 period. Changes in ward structure were taken into account in the outcomes calculated by  
2  
3  
4 164 including data according to the wards' opening periods.

### 6 165 **Descriptive analysis**

8 166 Data analyses were performed using R version 3.2.0 (R Core Team, Vienna). The number of  
9  
10  
11 167 admissions for each patient group, length of stay and age of RVGE patients was described  
12  
13 168 pre and post-vaccine introduction during the rotavirus season. Differences between  
14  
15  
16 169 continuous variables were tested using Student's t-test or Wilcoxon rank-sum test if not  
17  
18 170 normally distributed and  $\chi^2$ -test or Fisher's exact test for categorical variables.

### 21 171 **Statistical analysis**

23 172 To assess any changes in bed occupancy following rotavirus vaccine introduction,  
24  
25  
26 173 interrupted time-series analysis was used as previously described.[7] Monthly expected bed  
27  
28 174 occupancy was estimated by fitting a negative binomial regression model to pre-vaccine  
29  
30  
31 175 monthly bed occupancy data, adjusted for seasonality and secular trends using calendar  
32  
33 176 month and rotavirus year (July to June), respectively. A negative binomial model was chosen  
34  
35  
36 177 to account for overdispersion in the data. This model was used to predict the expected bed  
37  
38 178 occupancy rate in the absence of vaccination, where the post-vaccine introduction change is  
39  
40  
41 179 expressed by the difference between the expected and observed bed occupancy. To  
42  
43 180 quantify change in average bed occupancy in the rotavirus season as a result of introduction  
44  
45 181 of the vaccine, a second model included a binary indicator variable for the vaccine period,  
46  
47  
48 182 enabling the computation of risk ratios (RR) and associated 95% confidence intervals (CI).  
49  
50 183 This second model was restricted to the rotavirus season and adjusted for calendar month  
51  
52  
53 184 and rotavirus year. Percentage change in average bed occupancy was calculated as  $100(1 -$   
54  
55 185  $RR)$ .

### 57 186 **Ethics**

1 187 Ethics approval was provided by the NHS Research Ethics Committee, North East –  
2  
3  
4 188 Newcastle & North Tyneside 2 and by the Alder Hey Children’s NHS Foundation Trust  
5  
6 189 Research and Development Department.  
7

#### 8 190 **Patient and public involvement statement**

9  
10  
11 191 This study was conducted using secondary data and there was no new contact with patients  
12  
13 192 throughout the study. No patients were directly involved in designing the research question,  
14  
15  
16 193 conducting the research or interpretation of the research findings. Investigators have  
17  
18 194 presented these findings at national and international events  
19

#### 20 21 **RESULTS**

22  
23 196 In total, there were 116,871 admissions among 68,838 unique patients at any time in the  
24  
25 197 year during the study period from 1<sup>st</sup> July 2007 – 30<sup>th</sup> June 2015. Of those admissions,  
26  
27  
28 198 48,852 occurred during the rotavirus season.  
29

30 199 Testing for rotavirus remained stable throughout the pre-vaccination study period, with a  
31  
32  
33 200 median of 509 (IQR=481-539) admissions tested each rotavirus season, of which a median of  
34  
35 201 128 (25.2%) were positive (Figure 1). In the rotavirus seasons following rotavirus vaccine  
36  
37  
38 202 introduction, the proportion of rotavirus-positive test results amongst admissions tested  
39  
40 203 dropped to 3.8% (13/338) and 5.9% (16/272) in 2014 and 2015 respectively.  
41

42  
43 204 The median age of patients with RVGE was 11 months in the pre-vaccination period, and 22  
44  
45 205 months in the post-vaccination period ( $p=0.06$ ). Median length of hospital stay for patients  
46  
47 206 with CA RVGE did not differ between the pre- and post-vaccination period (2.2 vs. 2.4 days,  
48  
49  
50 207  $p=0.89$ ). Median length of stay from RVGE diagnosis to discharge for patients with HA RVGE  
51  
52 208 was not significantly different between the pre- and post-vaccination period (8.5 days pre  
53  
54 209 vs. 5.0 days post,  $p=0.88$ ) (Figure 2).  
55

56  
57 210 Length of stay for all admissions was highest during the respiratory virus season in  
58  
59 211 November/December and slightly increased from 2007 to 2012 ( $p<0.001$ ) (Supplementary  
60

1 212 Figure 1). No significant change in length of stay for all admissions was observed for the  
2  
3  
4 213 period 2012 to 2015 ( $p=0.21$ ).

#### 6 214 **Bed occupancy**

8 215 Figure 3 shows the average monthly bed occupancy for general medical wards for all  
9  
10  
11 216 admissions, admissions with a diagnosis of any infection, and admissions with a diagnosis of  
12  
13 217 RVGE. Bed occupancy for AGE is shown in Supplementary Figure 2. Clear seasonal patterns  
14  
15  
16 218 were observed for total bed occupancy, with highest overall bed occupancy for the  
17  
18 219 respiratory virus season in November/December, and lowest overall bed occupancy in the  
19  
20  
21 220 summer months. A year-on-year increase was observed for overall bed occupancy over the  
22  
23 221 study period ( $p<0.001$ ), from 79% bed occupancy in December 2007 to 90% in December  
24  
25 222 2014.

28 223 Bed occupancy for RVGE showed clear seasonal peaks before introduction of the vaccine,  
29  
30 224 with highest occupancy shown for February/March. After introduction of the rotavirus  
31  
32 225 vaccine, bed occupancy for RVGE in the rotavirus season was reduced by 89% (95%CI  
33  
34 226 73%,95%) (Table 1). Bed occupancy for any infectious disease increased year on year in the  
35  
36 227 pre-vaccination period, both within and outside the rotavirus season ( $p<0.001$  and  $p<0.001$   
37  
38 228 respectively), as did bed occupancy for AGE ( $p<0.001$  within,  $p=0.04$  outside rotavirus  
39  
40 229 season). Post introduction of the vaccine, observed bed occupancy for AGE in the rotavirus  
41  
42 230 season was reduced by 63% (95%CI 39%,78%) after adjustment for the positive trend in the  
43  
44 231 pre-vaccination period. Observed bed occupancy for any infection in the rotavirus season  
45  
46 232 was reduced by 23% (95%CI 15%,31%). No significant reduction was observed when  
47  
48 233 considering observed vs. expected bed occupancy for any cause of admission (-4%, 95%CI -  
49  
50 234 1%,9%). Sensitivity analyses with bed availability data taken at 9am and 5pm provided the  
51  
52 235 similar results.

236 **Table 1:** Average monthly bed occupancy and decline in bed occupancy comparing the pre-  
 237 and post-rotavirus vaccination period for any admission, any infection, acute gastroenteritis  
 238 and rotavirus gastroenteritis on general medical wards in Alder Hey NHS Foundation Trust,  
 239 July 2007 – June 2015.

| Variable                   | Average bed occupancy |                       | Crude Risk ratio (95% CI) | Adjusted Risk ratio (95% CI) <sup>1</sup> | Decline in bed occupancy (95% CI) | P-value |
|----------------------------|-----------------------|-----------------------|---------------------------|-------------------------------------------|-----------------------------------|---------|
|                            | Pre-vaccination<br>n  | Post-vaccination<br>n |                           |                                           |                                   |         |
| All                        | 77%<br>(70% - 85%)    | 79%<br>(67% - 87%)    | 1.03<br>(0.99,1.08)       | 0.96<br>(0.91,1.01)                       | 4%<br>(-1%,9%)                    | 0.15    |
| Any infection <sup>2</sup> | 39%<br>(25% - 56%)    | 42%<br>(33% - 51%)    | 1.09<br>(0.95,1.25)       | 0.77<br>(0.69,0.85)                       | 23%<br>(15%,31%)                  | <0.001  |
| AGE <sup>2</sup>           | 5%<br>(1% - 16%)      | 3%<br>(1% - 8%)       | 0.72<br>(0.45,1.13)       | 0.37<br>(0.22,0.61)                       | 63%<br>(39%,78%)                  | <0.001  |
| RVGE <sup>3</sup>          | 5%<br>(0% - 17%)      | 1%<br>(0% - 4%)       | 0.18<br>(0.09,0.35)       | 0.11<br>(0.05,0.27)                       | 89%<br>(73%,95%)                  | <0.001  |

240 AGE: acute gastroenteritis; CI: confidence interval; NHS: National Health Service; RVGE:  
 241 rotavirus gastroenteritis.

242 <sup>1</sup> Adjusted for seasonality and secular trend. <sup>2</sup> Diagnosis of any infection and AGE by clinical  
 243 coding only. <sup>3</sup> Diagnosis of RVGE by clinical coding and laboratory results.

1 244

2  
3  
4 245 **Hospital-acquired (HA) bloodstream infection rate**5  
6 246 A decrease in HA bloodstream infection was observed in the post-vaccination period,  
7  
8 247 although this did not appear different from secular trends in the pre-vaccination period  
9  
10  
11 248 (Figure 4).12  
13  
14 249 **Unplanned readmission rate**15  
16 250 No difference was observed between the unplanned readmission rate in the pre-vaccination  
17  
18 251 period and the post-vaccination period (Figure 5).19  
20  
21 252 **Outlier rate**22  
23 253 Clear seasonal patterns were observed for the outlier rate, with the highest peak during the  
24  
25 254 respiratory virus season in November/December, and a secondary peak during the rotavirus  
26  
27 255 season in January-May (Figure 6). The outlier rate increased in 2012, and remained high  
28  
29 256 throughout 2013-2015, both within and outside the rotavirus season. The increase in outlier  
30  
31 257 rate is synchronous with the closure of one specific ward, a large general medical ward in  
32  
33 258 November 2011, and the opening of a new medical admission unit (short-stay department  
34  
35  
36  
37 259 prior to discharge or admission to other wards).  
38  
39  
40  
41  
42  
43  
44  
45  
46  
47  
48  
49  
50  
51  
52  
53  
54  
55  
56  
57  
58  
59  
60

1       260    **DISCUSSION**

2  
3  
4       261    This is the first study to examine the effects of national vaccine introduction on wider  
5  
6       262    measures of hospital pressures in the UK. The introduction of rotavirus vaccine has led to a  
7  
8       263    large reduction in RVGE hospitalisation,[7] reflected in the reduction in proportion of  
9  
10       264   admissions tested rotavirus-positive and the reduction in bed occupancy due to RVGE and  
11  
12       265   AGE as described here. Lower bed occupancy for RVGE and AGE in the rotavirus season  
13  
14       266   post-vaccine introduction was concordant with lower bed occupancy for any infection in the  
15  
16       267   rotavirus season in the post-vaccination period. Despite the reduction in RVGE  
17  
18       268   hospitalisation, overall bed occupancy was not reduced. This suggests that a large, busy NHS  
19  
20       269   Trust, such as Alder Hey, operates at full capacity and that the beds that became available  
21  
22       270   by the reduction of RVGE hospitalisations were occupied by a different patient population,  
23  
24       271   probably reflecting a previously unmet need and/or physicians having greater freedom to  
25  
26       272   admit patients if beds have become available. The absence of a reduction in overall bed  
27  
28       273   occupancy could explain why reductions in the other proxy measures (HA-infection rate,  
29  
30       274   unplanned readmission rate, outlier rate) were not observed.  
31  
32       275   Two other studies have examined hospital pressures since rotavirus vaccination  
33  
34       276   introduction. A study conducted in two Finnish hospitals concluded that bed occupancy for  
35  
36       277   RVGE and AGE decreased since introduction of the vaccine.[17] There is no discussion of  
37  
38       278   changes in total bed occupancy, or on other proxy measures for hospital pressures following  
39  
40       279   rotavirus vaccine introduction. A study conducted in a general hospital in Belgium (36  
41  
42       280   paediatric beds) concluded that bed-day occupancy, bed-day turnover and unplanned  
43  
44       281   readmissions for AGE were lower in the post-vaccination compared with the pre-vaccination  
45  
46       282   periods, and that this resulted in improved quality of care for overall admissions.[8] In our  
47  
48       283   study, the reduction of bed occupancy for RVGE did not result in a change in overall bed  
49  
50       284   occupancy or other measures of hospital pressure. No change in hospital length of stay for

1 285 RVGE patients was observed. Median hospital stay for CA RVGE was shorter in Alder Hey  
2  
3  
4 286 NHS Foundation Trust than reported in the Belgian study (2.2 vs. 4.1 days), suggesting a  
5  
6 287 difference in management of RVGE cases, and could be an indicator of higher hospital  
7  
8  
9 288 pressure and more rapid patient turnover in Alder Hey.

10  
11 289 Several caveats need to be considered when using routinely collected data. Our analysis was  
12  
13 290 complicated by changes in hospital practises, in particular changes in patient flow,  
14  
15  
16 291 laboratory procedures, infection control and clinical coding. Firstly, several wards relevant  
17  
18 292 to this study opened or closed during the study period. Although ward closures were  
19  
20 293 accounted for in the bed occupancy analysis, more subtle changes in patient dynamics still  
21  
22 294 influenced our results. A steep increase was observed for the outlier rate in 2012, with the  
23  
24 295 higher level sustained throughout 2013-2015. The increase in outlier rate is synchronous  
25  
26 296 with the closure of a large general medical ward in November 2011, and the opening of a  
27  
28 297 new medical admission. It is possible that the change in ward structure led to an increased  
29  
30 298 bed usage in surgical and specialised medical wards.

31  
32  
33 299 Secondly, several changes in laboratory procedures were observed during the study period,  
34  
35  
36 300 most notably the introduction of polymerase chain reaction for the rapid testing of  
37  
38 301 respiratory pathogens in 2013. Faster diagnosis of respiratory infection could have had  
39  
40 302 implications for patient treatment, isolation practices and patient flow, and could have  
41  
42 303 influenced the measured hospital pressure outcomes. The number of admissions tested for  
43  
44 304 rotavirus did not change significantly over the study period, which provides confidence that  
45  
46 305 the drop in RVGE in the post-vaccine era is a real effect, and not caused by a change in  
47  
48 306 testing policy.

49  
50  
51 307 Thirdly, there were changes in infection prevention and control (IPC) practices in later years  
52  
53 308 of the study, including an increase in IPC staff; the introduction of isolation and hand  
54  
55 309 hygiene posters, bed space dividers screens and infection control enclosure isolation pods;



1 310 and changes in environmental cleaning. Changes in IPC practices will most likely have  
2  
3  
4 311 resulted in changes in HA infection rates – it is difficult to disentangle their effect on HA  
5  
6 312 infection from any effect due to a reduction in hospital pressures post-rotavirus vaccination  
7  
8  
9 313 introduction.

10  
11 314 We observed that bed occupancy for any infectious disease increased in the pre-vaccination  
12  
13  
14 315 period, both within and outside the rotavirus season. An increase in bed occupancy for any  
15  
16 316 respiratory infection (supplementary Figure 3) and any gastroenteritis was observed, but  
17  
18 317 neither increase can fully account for the overall increase in any infection. It is possible that  
19  
20  
21 318 the increase in infection observed is due to an artefact of the recording of the data.

22  
23 319 Supplementary Figure 4 shows that all clinical diagnostic coding increased over the study  
24  
25  
26 320 period. Clinical diagnostic coding increased for both cases with and without any infection  
27  
28 321 recorded. We observed that bed occupancy for any infection in the rotavirus season was  
29  
30  
31 322 lower than the expected bed occupancy for any infection based on pre-vaccination  
32  
33 323 estimates. The increase in any clinical diagnostic coding was sustained in 2014 and 2015,  
34  
35 324 providing confidence that our observation of lower than expected bed occupancy for any  
36  
37  
38 325 infection in the post-vaccination period is a true finding.

39  
40 326 Our analysis highlights the importance of the presentation of data from the full study period  
41  
42  
43 327 in a time-series analysis, rather than restricting the results to a “before-after” comparison,  
44  
45 328 when there is non-homogeneity in disease management, hospital management and data  
46  
47  
48 329 collection over time. A long-term increase in bed occupancy for any infection could be  
49  
50 330 observed (possibly due to an increase in clinical coding) that predated the introduction of  
51  
52  
53 331 vaccination: taking this ongoing increase in admissions coded as infection into account, a  
54  
55 332 reduction in bed occupancy for any infection can be observed.

56  
57 333 A further consideration is how changes to the catchment population size and referral  
58  
59  
60 334 patterns during the study period could affect our findings and their interpretation. There

1 335 has been a small but steady population growth in the surrounding region consistent with a  
2  
3  
4 336 national trend, which could increase demand upon the hospital and dampen any effect of  
5  
6 337 rotavirus vaccination on reducing these pressures. Finally, the impact of any changes in  
7  
8  
9 338 referral policy during the study period is difficult to quantify as Alder Hey serves a region of  
10  
11 339 over 7.1 million people.

12  
13 340 Routinely collected hospital data can be used for the evaluation of a (vaccination) policy, but  
14  
15  
16 341 our study highlights the difficulty of evaluating a (vaccination) policy in a period with  
17  
18 342 concurrent changes in patient flow, laboratory procedures and IPC practices.

19  
20  
21 343 The introduction of rotavirus vaccination has led to a dramatic reduction in hospitalisation  
22  
23 344 for RVGE and thus a reduction in bed occupancy for RVGE. However, overall bed occupancy  
24  
25 345 was not reduced further highlighting the severe strain the NHS is under and that demand is  
26  
27 346 outstripping capacity. Bed occupancy continues to rise and even a highly effective routine  
28  
29 347 vaccine only freed-up beds which were then filled by admissions, making no overall  
30  
31 348 headway into reducing the overall pressures the NHS is facing.

32  
33  
34  
35 349  
36  
37  
38  
39  
40  
41  
42  
43  
44  
45  
46  
47  
48  
49  
50  
51  
52  
53  
54  
55  
56  
57  
58  
59  
60

1 350 **ACKNOWLEDGMENTS**

2  
3  
4 351 **Financial support**

5  
6 352 GlaxoSmithKline Biologicals SA funded this study (NCT03271593) and was involved in all  
7  
8 353 stages of study conduct. GlaxoSmithKline Biologicals SA also took in charge all costs  
9  
10  
11 354 associated with the development and publication of this manuscript.

12  
13 355 **Conflicts of interest**

14  
15  
16  
17 356 Rotarix is a trademark of the GSK group of companies.

18  
19  
20  
21 357 NC, NF, and DH are in receipt of research grant support from the GSK group of companies

22  
23 358 for the conduct of the present study. NC has received honoraria for participation in GSK

24  
25 359 Rotavirus Vaccine Advisory Board Meetings from the GSK group of companies and from

26  
27 360 Watermark Research Partners for participation in independent data monitoring committee

28  
29 361 of GSK-sponsored clinical trials of Rotavirus vaccine. NC and NF's institution received grant

30  
31 362 from the GSK group of companies for the conduct of other analysis, not related to the

32  
33 363 present work. DH received grants from the GSK group of companies and Sanofi Pasteur, and

34  
35 364 Merck & Co., Inc. (Kenilworth, NJ USA) outside the submitted work. NBZ reports grants from

36  
37 365 the GSK group of companies and from Takeda Pharmaceuticals outside the submitted work.

38  
39 366 BS and ET are employees of the GSK group of companies. EH, RC, MC and JC have nothing to

40  
41  
42  
43 367 disclose.

44  
45  
46  
47  
48  
49 368 **Authorship and manuscript preparation**

50  
51  
52 369 DH, RPDC, MC, NC, NF designed the study and wrote the protocol. EH performed the

53  
54 370 analyses and wrote the manuscript. JSC and MC provided data for the study. NBZ provided

55  
56 371 statistical support. DH, RPDC, MC, JSC, NBZ, NF, NAC provided advice on the understanding

1 372 of the findings. ET and BS provided external advice. All authors approved the final version of  
2  
3  
4 373 the paper for submission.

5  
6 374 **Acknowledgements**  
7

8  
9 375 We thank Karl Edwardson, Christine Gerrard, Fiona Hardiman, Carly Quirk and Stephanie  
10  
11 376 Longmuir for their contribution in preparing the datasets required for this study. We would  
12  
13 377 also like to thank Business & Decision Life Sciences platform for editorial assistance and  
14  
15  
16 378 manuscript coordination, on behalf of GSK. Stephanie Garcia coordinated manuscript  
17  
18 379 development and editorial support.  
19

20  
21 380

22  
23 381 **Data sharing**  
24

25  
26 382 The results summary for this study (GSK study identifier: 205369 - ClinicalTrials.gov  
27  
28 383 identifier: NCT03271593) is available on the GSK Clinical Study Register and can be accessed  
29  
30 384 at [www.gsk-clinicalstudyregister.com](http://www.gsk-clinicalstudyregister.com). The full data that support the findings of this study  
31  
32 385 are held by Alder Hey Children's NHS Foundation Trust and restrictions apply to the  
33  
34 386 availability of these data as they are not publicly available. Aggregated data may be  
35  
36 387 available from the authors/ Alder Hey Children's NHS Foundation Trust on reasonable  
37  
38 388 request and with permission of Alder Hey Children's NHS Foundation Trust.  
39  
40  
41  
42  
43  
44  
45  
46  
47  
48  
49  
50  
51  
52  
53  
54  
55  
56  
57  
58  
59  
60

1  
2  
3  
4  
5  
6  
7  
8  
9  
10  
11  
12  
13  
14  
15  
16  
17  
18  
19  
20  
21  
22  
23  
24  
25  
26  
27  
28  
29  
30  
31  
32  
33  
34  
35  
36  
37  
38  
39  
40  
41  
42  
43  
44  
45  
46  
47  
48  
49  
50  
51  
52  
53  
54  
55  
56  
57  
58  
59  
60

## 389 References

- 390 1. Limb M. NHS misses key performance targets again in June. *BMJ* 2016;354:i4442.
- 391 2. O'Dowd A. NHS winter pressures are becoming an all year reality, warn experts. *BMJ*  
392 2016;354:i4907.
- 393 3. Smith P, McKeon A, Blunt I, et al. NHS hospitals under pressure: trends in acute activity up  
394 to 2022: Nuffield Trust, 2014.
- 395 4. Hospital Episode Statistics Analysis - Health and Social Care Information Centre. Hospital  
396 Episode Statistics - Admitted Patient Care, England - 2014-15, 2015.
- 397 5. Health and Social Care Information Centre. Hospital Episode Statistics – NHS Accident and  
398 Emergency Attendances in England - 2014-15. 2016.
- 399 6. Torjesen I. Paediatric services can't fill rotas. *BMJ* 2016;354:i4495.
- 400 7. Hungerford D, Read JM, Cooke RP, et al. Early impact of rotavirus vaccination in a large  
401 paediatric hospital in the UK. *J Hosp Infect* 2016;93(2):117-20.
- 402 8. Standaert B, Alwan A, Strens D, et al. Improvement in hospital Quality of Care (QoC) after  
403 the introduction of rotavirus vaccination: An evaluation study in Belgium. *Hum*  
404 *Vaccin Immunother* 2015;11(9):2266-73.
- 405 9. Forster AJ, Stiell I, Wells G, et al. The effect of hospital occupancy on emergency  
406 department length of stay and patient disposition. *Acad Emerg Med* 2003;10(2):127-  
407 33.
- 408 10. Harris JP, Jit M, Cooper D, et al. Evaluating rotavirus vaccination in England and Wales.  
409 Part I. Estimating the burden of disease. *Vaccine* 2007;25(20):3962-70.
- 410 11. Public Health England. National rotavirus immunisation programme: preliminary data for  
411 England, February 2016 to July 2016. *HPR* 2016;10(32).
- 412 12. Atchison CJ, Stowe J, Andrews N, et al. Rapid Declines in Age Group-Specific Rotavirus  
413 Infection and Acute Gastroenteritis Among Vaccinated and Unvaccinated Individuals

- 1 414 Within 1 Year of Rotavirus Vaccine Introduction in England and Wales. *J Infect Dis*  
2  
3  
4 415 2016;213(2):243-9.  
5  
6 416 13. Hungerford D, Vivancos R, Read JM, et al. Rotavirus vaccine impact and socioeconomic  
7  
8 417 deprivation: an interrupted time-series analysis of gastrointestinal disease outcomes  
9  
10  
11 418 across primary and secondary care in the UK. *BMC Med* 2018;16(1):10.  
12  
13 419 14. World Health Organisation. International Statistical Classification of Diseases and  
14  
15  
16 420 Related Health Problems - 10th revision. 1992.  
17  
18 421 15. Wilson SE, Deeks SL, Rosella LC. Importance of ICD-10 coding directive change for acute  
19  
20  
21 422 gastroenteritis (unspecified) for rotavirus vaccine impact studies: illustration from a  
22  
23 423 population-based cohort study from Ontario, Canada. *BMC Res Notes* 2015;8:439.  
24  
25  
26 424 16. Hungerford D, Vivancos R, Read JM, et al. In-season and out-of-season variation of  
27  
28 425 rotavirus genotype distribution and age of infection across 12 European countries  
29  
30 426 before the introduction of routine vaccination, 2007/08 to 2012/13. *Euro Surveill*  
31  
32 427 2016;21(2).  
33  
34  
35 428 17. Hartwig S, Uhari M, Renko M, et al. Hospital bed occupancy for rotavirus and all cause  
36  
37 429 acute gastroenteritis in two Finnish hospitals before and after the implementation of  
38  
39 430 the national rotavirus vaccination program with RotaTeq(R). *BMC Health Serv Res*  
40  
41 431 2014;14:632.  
42  
43  
44  
45  
46 432  
47  
48  
49 433  
50  
51  
52  
53  
54  
55  
56  
57  
58  
59  
60

1 434 **Figures Captions**

2  
3  
4 435 **Figure 1. Number of admissions tested for rotavirus in the rotavirus season in Alder Hey**  
5  
6 436 **NHS Foundation Trust, July 2007 – June 2015.**

7  
8  
9 437 *NHS: National Health Service.*

10  
11 438 **Figure 2. Total length of stay for CA and HA RVGE.**

12  
13  
14 439 For HA RVGE, length of stay was calculated from date of first positive test.

15  
16 440 *CA: community-acquired; HA: hospital-acquired.*

17  
18 441 **Figure 3. Observed and expected bed occupancy for any admission, any infection and**  
19  
20  
21 442 **rotavirus gastroenteritis on general medical wards in Alder Hey NHS Foundation Trust,**  
22  
23 443 **July 2007 – June 2015.**

24  
25  
26 444 The coloured shading represents the 95% confidence intervals for the expected incidence.

27  
28 445 Grey shading represents the rotavirus season (January-May). The vertical hashed line  
29  
30 446 represents the introduction of rotavirus vaccine in the UK in July 2013.

31  
32  
33 447 *NHS: National Health Service.*

34  
35 448 **Figure 4. Hospital acquired bloodstream infection rate on general medical wards in Alder**  
36  
37  
38 449 **Hey NHS Foundation Trust, July 2007 – June 2015.**

39  
40 450 Black line shows raw data, red line shows smoothed data. Grey shading represents the  
41  
42  
43 451 rotavirus season (January-May). The vertical hashed line represents the introduction of  
44  
45 452 rotavirus vaccine in the UK in July 2013.

46  
47  
48 453 *HA: hospital-acquired; NHS: National Health Service.*

49  
50 454 **Figure 5. Unplanned readmission rate for any admission on general medical wards in Alder**  
51  
52  
53 455 **Hey NHS Foundation Trust, July 2007 – June 2015.**

54  
55 456 Raw data in black, smoothed data in red. Grey shading represents the rotavirus season

56  
57 457 (January-May). The vertical hashed line represents the introduction of rotavirus vaccine in  
58  
59  
60 458 the UK in July 2013.

1 459 *NHS: National Health Service.*

2  
3  
4 460 **Figure 6. Outlier rate for any admission in Alder Hey NHS Foundation Trust, July 2007 –**  
5  
6 461 **June 2015.**

7  
8 462 Raw data in black, smoothed data in red. Grey shading represents the rotavirus season  
9  
10  
11 463 (January-May). The vertical hashed line represents the introduction of rotavirus vaccine in  
12  
13 464 the UK in July 2013.

15  
16 465 *NHS: National Health Service.*

17  
18 466

19  
20  
21 467

For peer review only



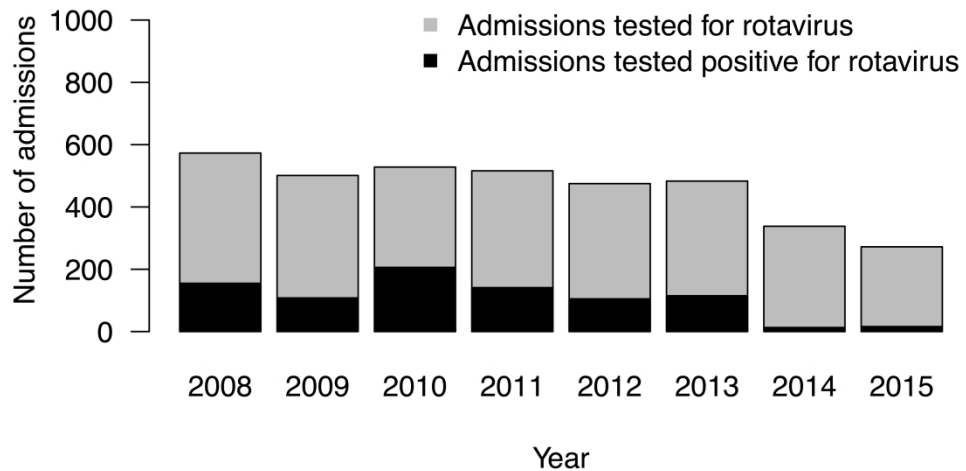

Figure 1. Number of admissions tested for rotavirus in the rotavirus season in Alder Hey NHS Foundation Trust, July 2007 – June 2015.  
*NHS: National Health Service.*

169x96mm (600 x 600 DPI)

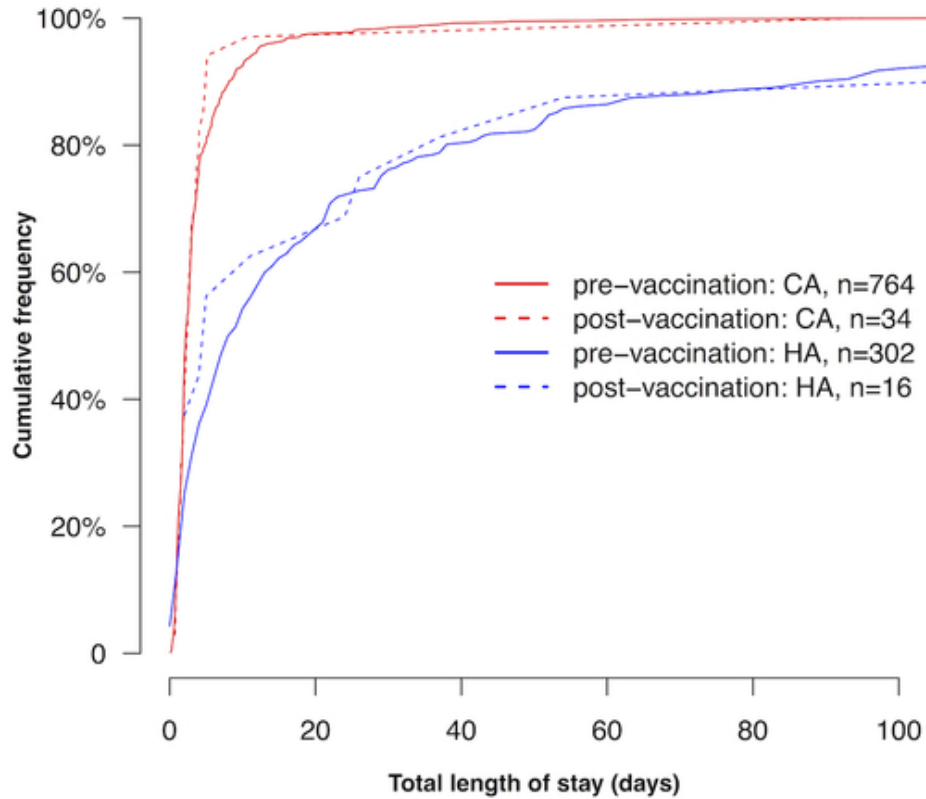

**Figure 2. Total length of stay for CA and HA RVGE.**

For HA RVGE, length of stay was calculated from date of first positive test.  
*CA: community-acquired; HA: hospital-acquired.*

22x22mm (600 x 600 DPI)

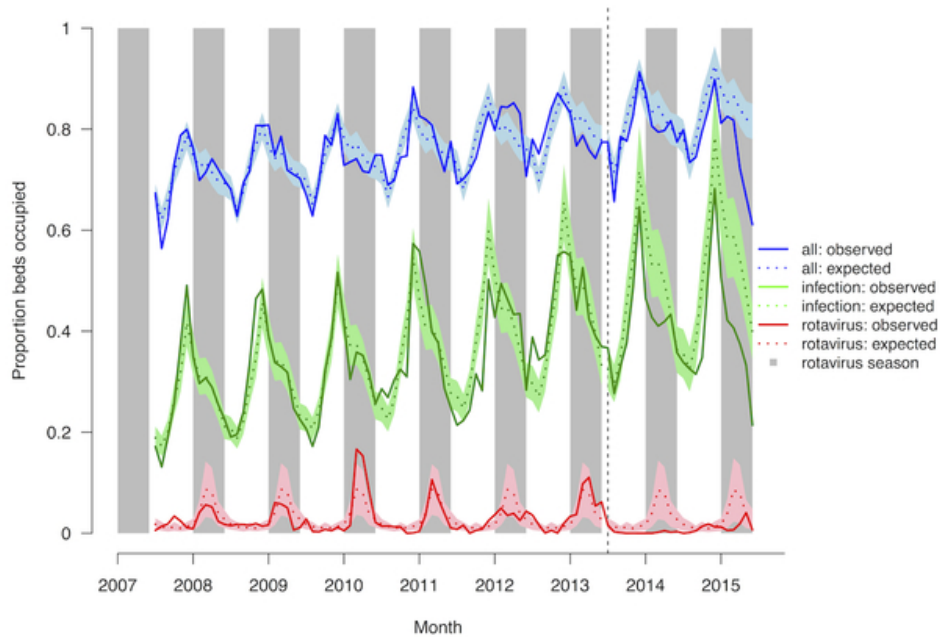

**Figure 3. Observed and expected bed occupancy for any admission, any infection and rotavirus gastroenteritis on general medical wards in Alder Hey NHS Foundation Trust, July 2007 – June 2015.**

The coloured shading represents the 95% confidence intervals for the expected incidence. Grey shading represents the rotavirus season (January-May). The vertical hashed line represents the introduction of rotavirus vaccine in the UK in July 2013.

*NHS: National Health Service.*

27x17mm (600 x 600 DPI)

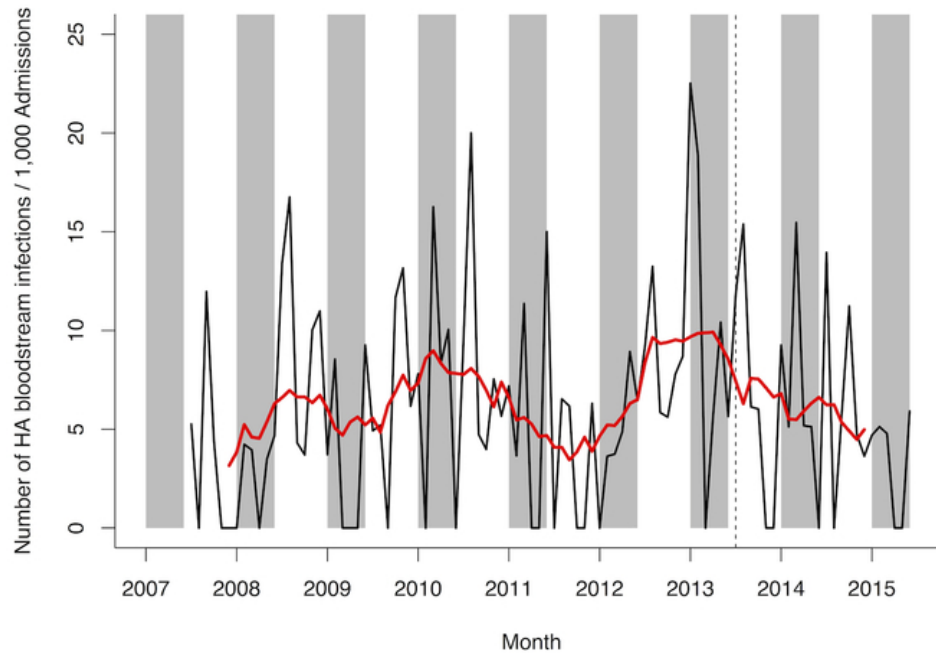

**Figure 4. Hospital acquired bloodstream infection rate on general medical wards in Alder Hey NHS Foundation Trust, July 2007 – June 2015.**

Black line shows raw data, red line shows smoothed data. Grey shading represents the rotavirus season (January-May). The vertical hashed line represents the introduction of rotavirus vaccine in the UK in July 2013.

*HA: hospital-acquired; NHS: National Health Service.*

29x22mm (600 x 600 DPI)

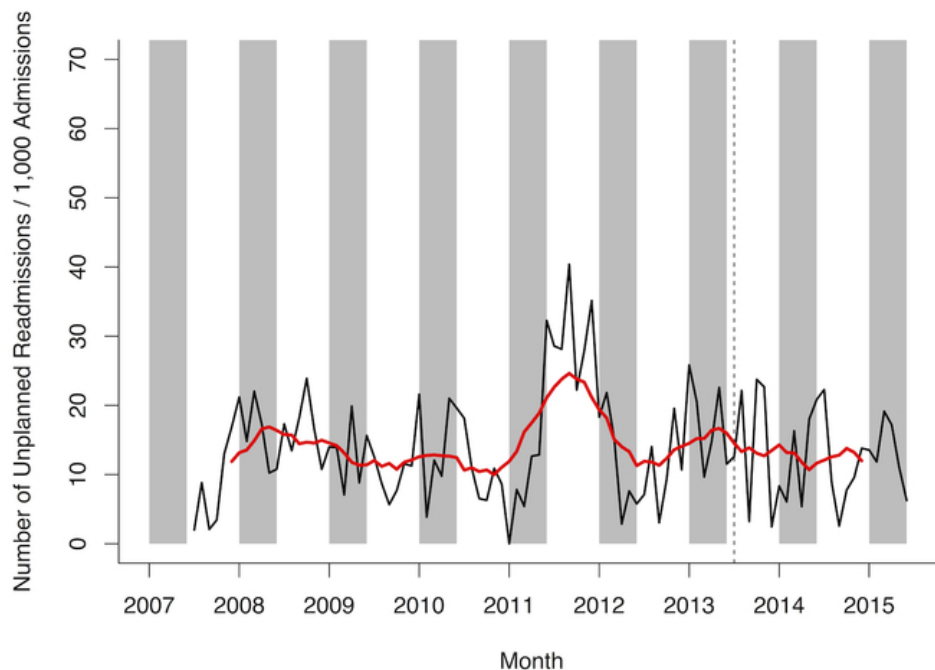

**Figure 5. Unplanned readmission rate for any admission on general medical wards in Alder Hey NHS Foundation Trust, July 2007 – June 2015.**

Raw data in black, smoothed data in red. Grey shading represents the rotavirus season (January-May). The vertical hashed line represents the introduction of rotavirus vaccine in the UK in July 2013.

*NHS: National Health Service.*

29x22mm (600 x 600 DPI)

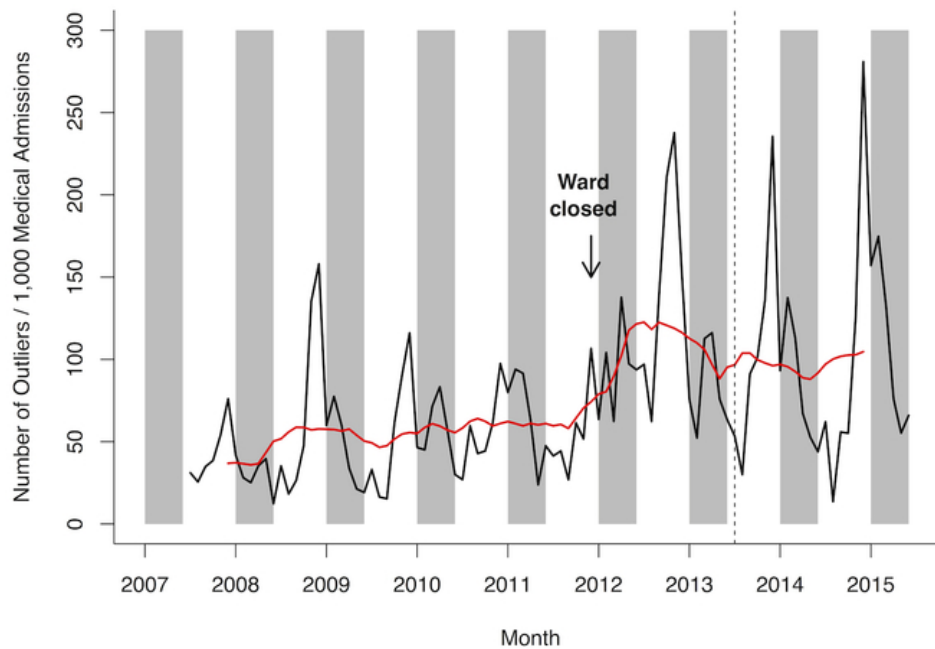

**Figure 6. Outlier rate for any admission in Alder Hey NHS Foundation Trust, July 2007 – June 2015.**

Raw data in black, smoothed data in red. Grey shading represents the rotavirus season (January-May). The vertical hashed line represents the introduction of rotavirus vaccine in the UK in July 2013.

*NHS: National Health Service.*

29x22mm (600 x 600 DPI)

## 1 Supplementary Material

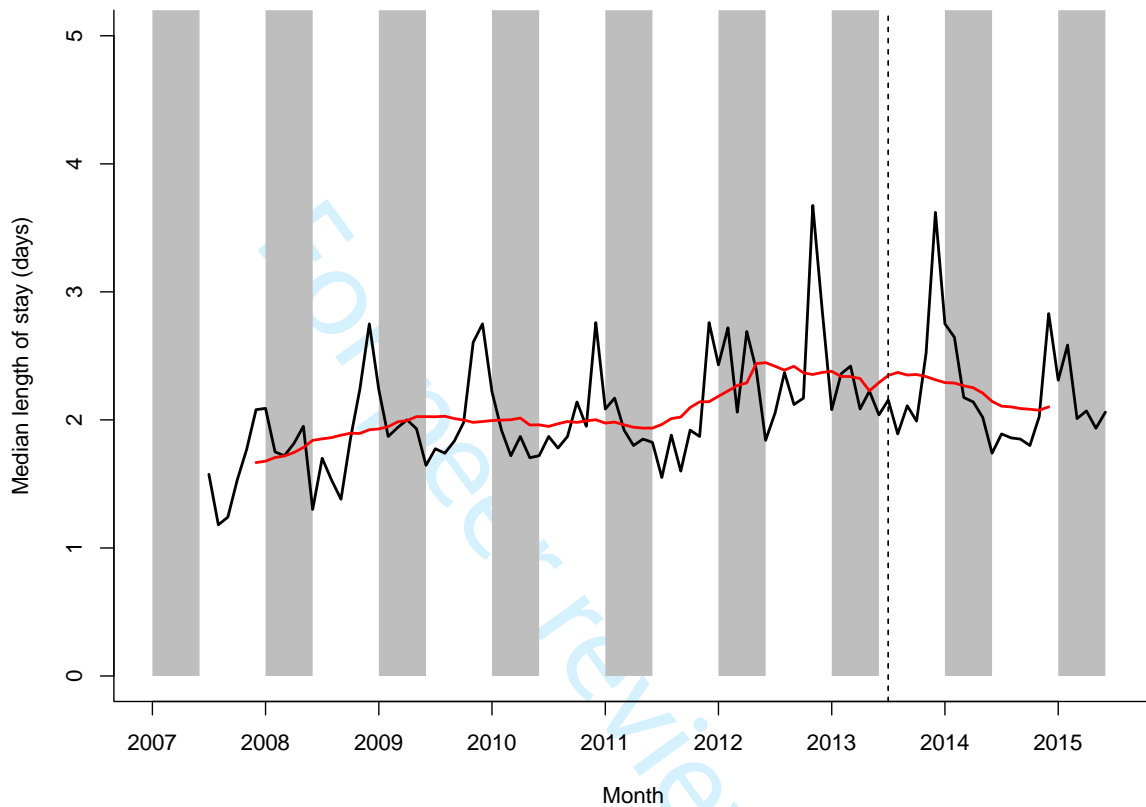

2

3 **Supplementary Figure 1. Median length of stay (all admissions) on general medical wards in Alder**  
4 **Hey Children's NHS Foundation Trust, July 2007 – June 2015.** Raw data in black, smoothed data in  
5 red. Grey shading represents the rotavirus season (January-May). The vertical hashed line represents  
6 the introduction of rotavirus vaccine in the UK in July 2013.

7 *NHS: National Health Service.*

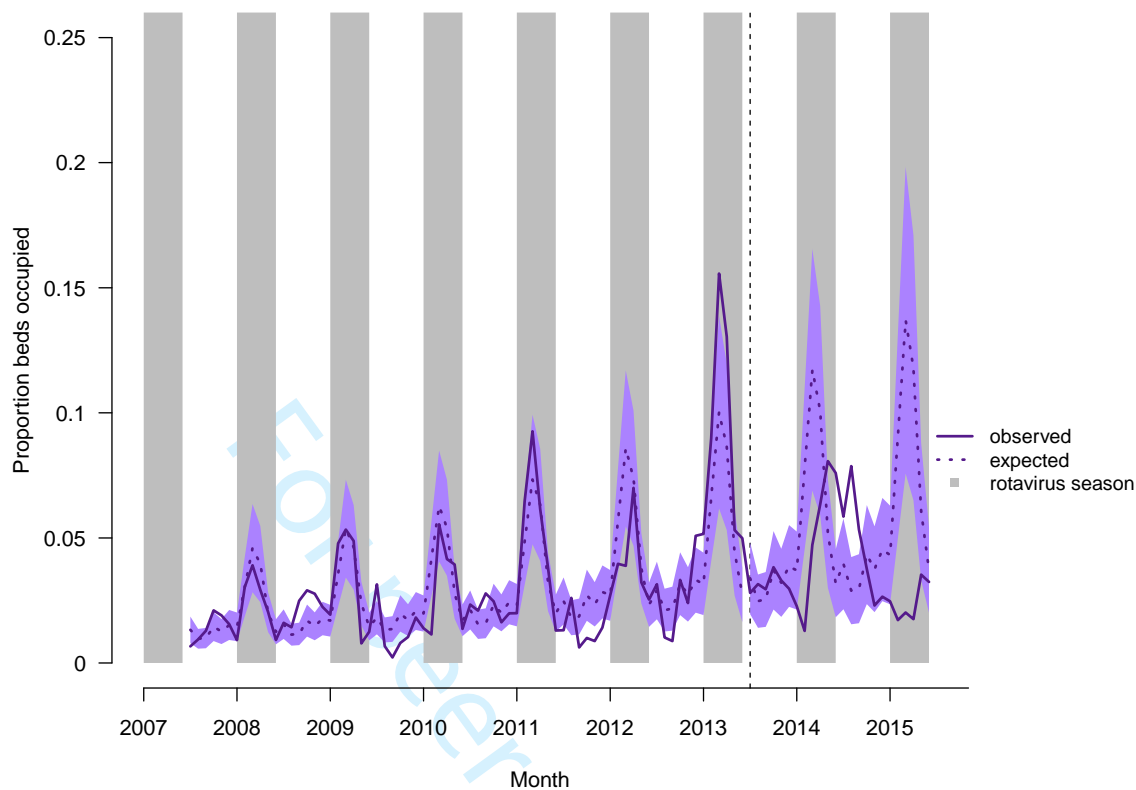

1

2 **Supplementary Figure 2. Observed and expected bed occupancy for acute gastroenteritis on**  
 3 **general medical wards in Alder Hey NHS Foundation Trust, July 2007 – June 2015.** The coloured  
 4 shading represents the 95% confidence intervals for the expected incidence. Grey shading  
 5 represents the rotavirus season (January-May). The vertical hashed line represents the introduction  
 6 of rotavirus vaccine in the UK in July 2013.

7 *NHS: National Health Service.*



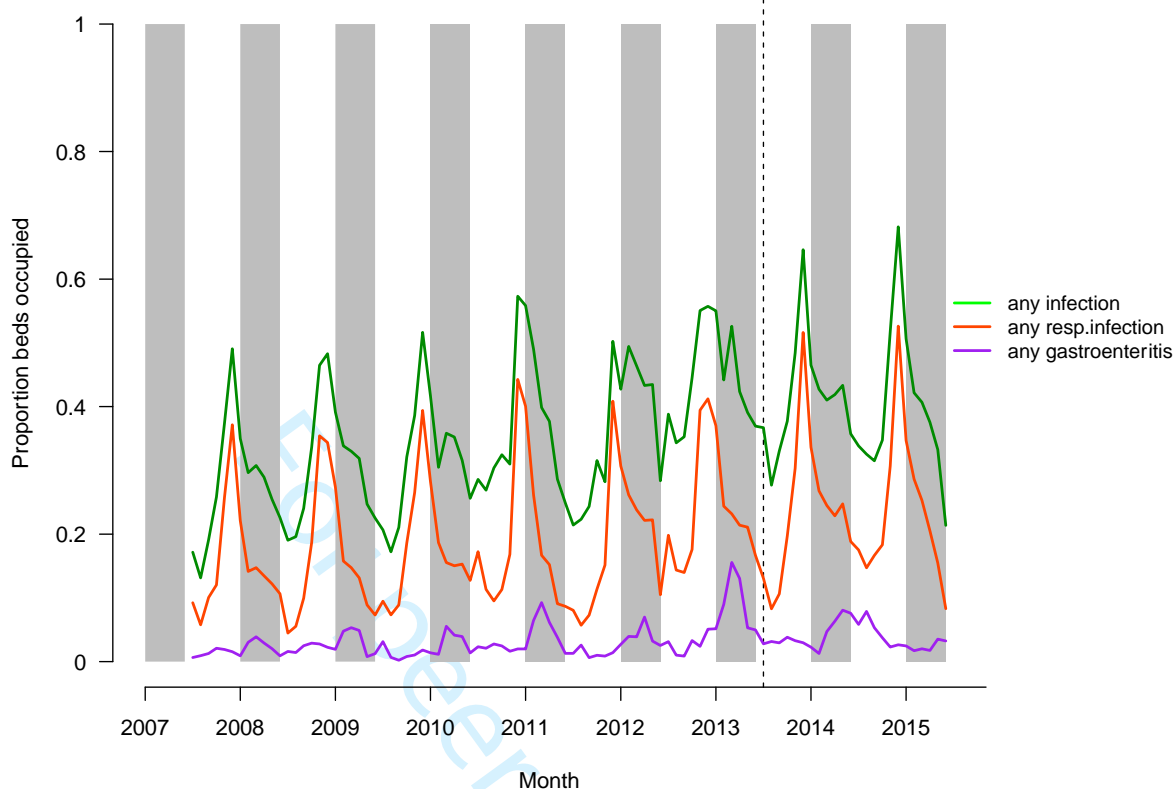

1

2 **Supplementary Figure 3. Observed bed occupancy for any infection, any respiratory infection and**  
 3 **any gastroenteritis (by clinical coding only) in general medical wards in Alder Hey NHS Foundation**  
 4 **Trust, July 2007 – June 2015.** The vertical hashed line represents the introduction of rotavirus  
 5 vaccine in the UK in July 2013.

6 *NHS: National Health Service; resp.: respiratory.*

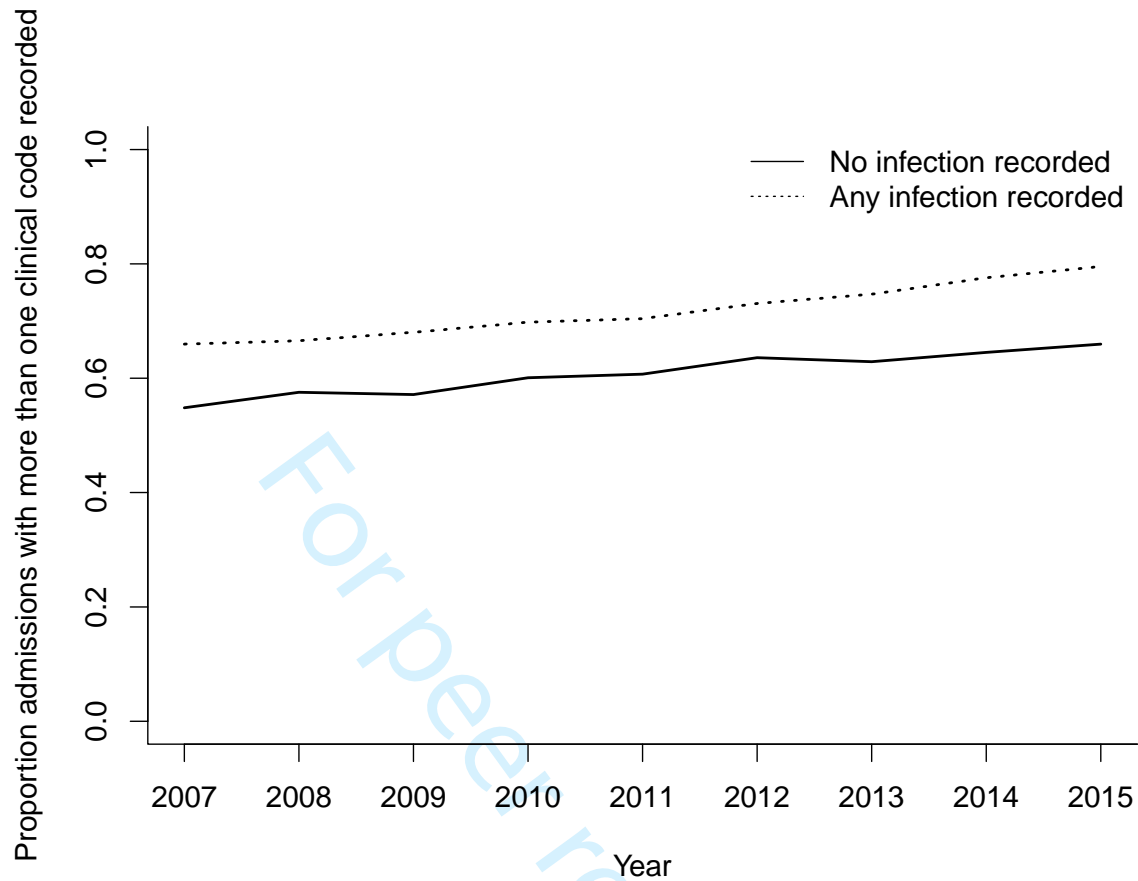

1

2 **Supplementary Figure 4. Proportion of admissions to general medical wards for whom more than**  
3 **one clinical code was recorded, Alder Hey NHS Foundation Trust, July 2007 – June 2015**

4 *NHS: National Health Service.*

## STROBE Statement—checklist of items that should be included in reports of observational studies

|                           | Item No | Recommendation                                                                                                                                                                                                                                                                                                                                                                                                                                                         | Checklist                                                                                                                                                                             |
|---------------------------|---------|------------------------------------------------------------------------------------------------------------------------------------------------------------------------------------------------------------------------------------------------------------------------------------------------------------------------------------------------------------------------------------------------------------------------------------------------------------------------|---------------------------------------------------------------------------------------------------------------------------------------------------------------------------------------|
| <b>Title and abstract</b> | 1       | (a) Indicate the study's design with a commonly used term in the title or the abstract                                                                                                                                                                                                                                                                                                                                                                                 | Included "Retrospective hospital database analysis" in abstract                                                                                                                       |
|                           |         | (b) Provide in the abstract an informative and balanced summary of what was done and what was found                                                                                                                                                                                                                                                                                                                                                                    | Included                                                                                                                                                                              |
| <b>Introduction</b>       |         |                                                                                                                                                                                                                                                                                                                                                                                                                                                                        |                                                                                                                                                                                       |
| Background/rationale      | 2       | Explain the scientific background and rationale for the investigation being reported                                                                                                                                                                                                                                                                                                                                                                                   | Included                                                                                                                                                                              |
| Objectives                | 3       | State specific objectives, including any prespecified hypotheses                                                                                                                                                                                                                                                                                                                                                                                                       | Included "The aim of this study was to assess hospital pressures at a large UK NHS paediatric hospital pre- and post- rotavirus vaccine introduction using routinely collected data." |
| <b>Methods</b>            |         |                                                                                                                                                                                                                                                                                                                                                                                                                                                                        |                                                                                                                                                                                       |
| Study design              | 4       | Present key elements of study design early in the paper                                                                                                                                                                                                                                                                                                                                                                                                                | Included in paragraph 'data sources'                                                                                                                                                  |
| Setting                   | 5       | Describe the setting, locations, and relevant dates, including periods of recruitment, exposure, follow-up, and data collection                                                                                                                                                                                                                                                                                                                                        | Included in paragraph 'setting'                                                                                                                                                       |
| Participants              | 6       | (a) <i>Cohort study</i> —Give the eligibility criteria, and the sources and methods of selection of participants. Describe methods of follow-up<br><i>Case-control study</i> —Give the eligibility criteria, and the sources and methods of case ascertainment and control selection. Give the rationale for the choice of cases and controls<br><i>Cross-sectional study</i> —Give the eligibility criteria, and the sources and methods of selection of participants | Inclusion and exclusion criteria included in paragraph 'study population and definitions'                                                                                             |
|                           |         | (b) <i>Cohort study</i> —For matched studies, give matching criteria and number of exposed and unexposed<br><i>Case-control study</i> —For matched studies, give matching criteria and the number of controls per case                                                                                                                                                                                                                                                 | Not applicable for this observational study                                                                                                                                           |
| Variables                 | 7       | Clearly define all outcomes, exposures, predictors, potential confounders, and effect modifiers. Give diagnostic criteria, if applicable                                                                                                                                                                                                                                                                                                                               | Included in paragraphs 'study population and definitions' and 'outcomes'                                                                                                              |
| Data sources/             | 8*      | For each variable of interest, give sources of data and details of methods of assessment                                                                                                                                                                                                                                                                                                                                                                               | Included in paragraph 'data sources'.                                                                                                                                                 |

1  
2  
3  
4  
5  
6  
7  
8  
9  
10  
11  
12  
13  
14  
15  
16  
17  
18  
19  
20  
21  
22  
23  
24  
25  
26  
27  
28  
29  
30  
31  
32  
33  
34  
35  
36  
37  
38  
39  
40  
41  
42  
43  
44  
45  
46

measurement

(measurement). Describe comparability of assessment methods if there is more than one group

|                        |    |                                                                                                                                                                                                                                                                                                           |                                                                                                                                                                                                                                                     |
|------------------------|----|-----------------------------------------------------------------------------------------------------------------------------------------------------------------------------------------------------------------------------------------------------------------------------------------------------------|-----------------------------------------------------------------------------------------------------------------------------------------------------------------------------------------------------------------------------------------------------|
| Bias                   | 9  | Describe any efforts to address potential sources of bias                                                                                                                                                                                                                                                 | - 2007 onwards data only included to account for changes in clinical coding (included in paragraph 'data sources')<br>- inclusion of diagnosis coding for non-infectious gastroenteritis (included in paragraph 'study population and definitions') |
| Study size             | 10 | Explain how the study size was arrived at                                                                                                                                                                                                                                                                 | Sampling not applicable: this observational study included <i>all</i> patients aged 0-14 years                                                                                                                                                      |
| Quantitative variables | 11 | Explain how quantitative variables were handled in the analyses. If applicable, describe which groupings were chosen and why                                                                                                                                                                              | Included in paragraphs 'outcomes' and 'statistical analysis'.                                                                                                                                                                                       |
| Statistical methods    | 12 | (a) Describe all statistical methods, including those used to control for confounding                                                                                                                                                                                                                     | Included in paragraphs 'outcomes' and 'statistical analysis'.                                                                                                                                                                                       |
|                        |    | (b) Describe any methods used to examine subgroups and interactions                                                                                                                                                                                                                                       | Included in paragraphs 'outcomes' and 'statistical analysis'.                                                                                                                                                                                       |
|                        |    | (c) Explain how missing data were addressed                                                                                                                                                                                                                                                               | Not applicable for hospital database analysis                                                                                                                                                                                                       |
|                        |    | (d) <i>Cohort study</i> —If applicable, explain how loss to follow-up was addressed<br><i>Case-control study</i> —If applicable, explain how matching of cases and controls was addressed<br><i>Cross-sectional study</i> —If applicable, describe analytical methods taking account of sampling strategy | Not applicable for observational study                                                                                                                                                                                                              |
|                        |    | (e) Describe any sensitivity analyses                                                                                                                                                                                                                                                                     | Not applicable                                                                                                                                                                                                                                      |

Continued on next page

**Results**

|                  |     |                                                                                                                                                                                                              |                                                                                                                                                   |
|------------------|-----|--------------------------------------------------------------------------------------------------------------------------------------------------------------------------------------------------------------|---------------------------------------------------------------------------------------------------------------------------------------------------|
| Participants     | 13* | (a) Report numbers of individuals at each stage of study—eg numbers potentially eligible, examined for eligibility, confirmed eligible, included in the study, completing follow-up, and analysed            | Included in first paragraph of results                                                                                                            |
|                  |     | (b) Give reasons for non-participation at each stage                                                                                                                                                         | Not applicable                                                                                                                                    |
|                  |     | (c) Consider use of a flow diagram                                                                                                                                                                           | Not applicable                                                                                                                                    |
| Descriptive data | 14* | (a) Give characteristics of study participants (eg demographic, clinical, social) and information on exposures and potential confounders                                                                     | Median age of participants included. Median length of stay of participants included                                                               |
|                  |     | (b) Indicate number of participants with missing data for each variable of interest                                                                                                                          | Not applicable                                                                                                                                    |
|                  |     | (c) <i>Cohort study</i> —Summarise follow-up time (eg, average and total amount)                                                                                                                             | Not applicable                                                                                                                                    |
| Outcome data     | 15* | <i>Cohort study</i> —Report numbers of outcome events or summary measures over time                                                                                                                          | Not applicable                                                                                                                                    |
|                  |     | <i>Case-control study</i> —Report numbers in each exposure category, or summary measures of exposure                                                                                                         | Not applicable                                                                                                                                    |
|                  |     | <i>Cross-sectional study</i> —Report numbers of outcome events or summary measures                                                                                                                           | Not applicable                                                                                                                                    |
| Main results     | 16  | (a) Give unadjusted estimates and, if applicable, confounder-adjusted estimates and their precision (eg, 95% confidence interval). Make clear which confounders were adjusted for and why they were included | Unadjusted estimates included in figures 1-6.<br>Adjusted analysis for bed occupancy included in Table 1.                                         |
|                  |     | (b) Report category boundaries when continuous variables were categorized                                                                                                                                    | Not applicable                                                                                                                                    |
|                  |     | (c) If relevant, consider translating estimates of relative risk into absolute risk for a meaningful time period                                                                                             | Risk ratio translated in decline in bed occupancy in Table 1                                                                                      |
| Other analyses   | 17  | Report other analyses done—eg analyses of subgroups and interactions, and sensitivity analyses                                                                                                               | - Analysis of clinical coding included in Supplementary figure 4<br>- Analysis of bed occupancy for infection included in Supplementary figure 3. |

**Discussion**

|                |    |                                                                                                                                                            |                                                        |
|----------------|----|------------------------------------------------------------------------------------------------------------------------------------------------------------|--------------------------------------------------------|
| Key results    | 18 | Summarise key results with reference to study objectives                                                                                                   | Included in first paragraph discussion and conclusions |
| Limitations    | 19 | Discuss limitations of the study, taking into account sources of potential bias or imprecision. Discuss both direction and magnitude of any potential bias | Included in discussion                                 |
| Interpretation | 20 | Give a cautious overall interpretation of results considering objectives, limitations,                                                                     | Included in discussion                                 |

1  
2  
3  
4  
5  
6  
7  
8  
9  
10  
11  
12  
13  
14  
15  
16  
17  
18  
19  
20  
21  
22  
23  
24  
25  
26  
27  
28  
29  
30  
31  
32  
33  
34  
35  
36  
37  
38  
39  
40  
41  
42  
43  
44  
45  
46

multiplicity of analyses, results from similar studies, and other relevant evidence

|                  |    |                                                                                                                                                               |                               |
|------------------|----|---------------------------------------------------------------------------------------------------------------------------------------------------------------|-------------------------------|
| Generalisability | 21 | Discuss the generalisability (external validity) of the study results                                                                                         | Included in discussion        |
| Funding          | 22 | Give the source of funding and the role of the funders for the present study and, if applicable, for the original study on which the present article is based | Included in Funding Statement |

\*Give information separately for cases and controls in case-control studies and, if applicable, for exposed and unexposed groups in cohort and cross-sectional studies.

**Note:** An Explanation and Elaboration article discusses each checklist item and gives methodological background and published examples of transparent reporting. The STROBE checklist is best used in conjunction with this article (freely available on the Web sites of PLoS Medicine at <http://www.plosmedicine.org/>, Annals of Internal Medicine at <http://www.annals.org/>, and Epidemiology at <http://www.epidem.com/>). Information on the STROBE Initiative is available at [www.strobe-statement.org](http://www.strobe-statement.org).
